# Supplementary material for: Nickel-catalyzed C–O bond reduction of aryl and benzyl 2-pyridyl ethers
Source: Royal Society of Chemistry journal article supplement (doi:10.1039/c7cc09668b), 2018-01-01

Electronic Supplementary Information

## Nickel-catalyzed C-O bond reduction of aryl and benzyl 2-pyridyl ethers

Jing Li<sup>a</sup> and Zhong-Xia Wang<sup>\*,a,b</sup>

<sup>a</sup> CAS Key Laboratory of Soft Matter Chemistry, Hefei National Laboratory for Physical Sciences at Microscale and Department of Chemistry, University of Science and Technology of China, Hefei, Anhui 230026, P. R. China. E-mail: zwxwang@ustc.edu.cn

<sup>b</sup> Collaborative Innovation Center of Chemical Science and Engineering, Tianjin 300072, P. R. China.

### Contents

|                                                                                          |       |
|------------------------------------------------------------------------------------------|-------|
| I. Experimental procedures and spectral data                                             | 2     |
| 1. The preparation of sodium isopropoxide                                                | 2     |
| 2. The typical procedure for the nickel-catalyzed hydrogenation of aryl 2-pyridyl ethers | 2     |
| 3. Nickel-catalyzed hydrogenation of 2-(biphenyl-4-yloxy)pyridine (4 mmol scale)         | 3     |
| 4. Spectral data for the cross-coupling products                                         | 3-6   |
| (1) 1,1'-biphenyl ( <b>2a</b> )                                                          | 3     |
| (2) oxydibenzene ( <b>2c</b> )                                                           | 3     |
| (3) (benzyloxy)benzene ( <b>2d</b> )                                                     | 3     |
| (4) 4-fluoro-1,1'-biphenyl ( <b>2f</b> )                                                 | 4     |
| (5) ( <i>E</i> )-1,2-diphenylethene ( <b>2g</b> )                                        | 4     |
| (6) <i>N</i> -phenylacetamide ( <b>2h</b> )                                              | 4     |
| (7) <i>tert</i> -butyl methyl(phenyl)carbamate ( <b>2i</b> )                             | 4     |
| (8) benzophenone ( <b>2k</b> )                                                           | 5     |
| (9) <i>N,N</i> -diethylbenzamide ( <b>2l</b> )                                           | 5     |
| (10) 4-methyl-1,1'-biphenyl ( <b>4a</b> )                                                | 5     |
| (11) 2-methylnaphthalene ( <b>4d</b> )                                                   | 5     |
| (12) 6-methylquinoline ( <b>4e</b> )                                                     | 5     |
| (13) diphenylmethane ( <b>4f</b> )                                                       | 6     |
| II. Reaction mechanism                                                                   | 6-8   |
| (1) Deuterium labeling experiment                                                        | 6     |
| (2) Kinetic isotope effect experiment                                                    | 8     |
| References                                                                               | 9     |
| III. Copies of NMR spectra                                                               | 10-23 |

## I. Experimental procedures and spectral data

### General

All reactions were performed under nitrogen atmosphere using standard Schlenk and vacuum line techniques. Toluene, THF and Et<sub>2</sub>O were purified by JC Meyer Phoenix Solvent Systems. 1,4-Dioxane and xylene were distilled over sodium under nitrogen. DMF was dried over 4 Å molecular sieve, fractionally distilled under reduced pressure and stored under nitrogen. Ni(COD)<sub>2</sub> was purchased from Strem Chemicals Inc and used as received. 3-(Biphenyl-4-yloxy)pyridine and 4-(biphenyl-4-yloxy)pyridine were purchased from Energy Chemical and used as received. NHC ligands,<sup>2</sup> aryl and benzyl 2-pyridyl ethers<sup>3,4</sup> and related starting materials<sup>5</sup> were prepared according to reported procedures. All other chemicals were obtained from commercial vendors and used as received. Gas chromatography (GC) analysis was conducted on a Aligent 7820A instrument. NMR spectra were recorded on a Bruker Avance III 400 spectrometer at ambient temperature. The chemical shifts of the <sup>1</sup>H NMR spectra were referenced to TMS or internal solvent resonance and the chemical shifts of the <sup>13</sup>C NMR spectra were referenced to internal solvent resonance.

### 1. Preparation of sodium isopropoxide<sup>1</sup>

Sodium (0.23 g, 10 mmol) and xylene (20 cm<sup>3</sup>) were placed in a N<sub>2</sub>-filled three-neck flask and heated until the sodium melted. The flask was closed with a rubber stopper, and the sodium was finely powdered by vigorous shaking. Then the xylene was removed by filtration and the powdered sodium was washed with two 10 cm<sup>3</sup> portions of diethyl ether. 30 cm<sup>3</sup> of diethyl ether was added, and the flask was placed on a 50 °C oil bath with a condenser. Anhydrous isopropanol (0.77 cm<sup>3</sup>, 10 mmol) was added dropwise with stirring. The reaction mixture was refluxed with stirring for 8 h. The solvent was removed by filtration. The residual solid was washed twice with diethyl ether and dried under vacuum.

### 2. Typical procedure for the nickel-catalyzed hydrogenation of aryl 2-pyridyl ethers

A Schlenk tube was charged with Ni(COD)<sub>2</sub> (1.7 mg, 0.006 mmol), IPr·HCl (2.6 mg, 0.006 mmol), *i*-PrONa (25 mg, 0.30 mmol), 2-([1,1'-biphenyl]-4-yloxy)pyridine (49.4 mg, 0.2

mmol) and THF (1 cm<sup>3</sup>). The mixture was stirred at 60 °C for 2 h. Volatiles were removed by rotary evaporation. The residue was purified by column chromatography on silica gel or preparative thin layer chromatography (petroleum ether/EtOAc 60:1 v/v) to give 1,1'-biphenyl as a white solid, yield 30.5 mg (99%).

### 3. Nickel-catalyzed hydrogenation of 2-(biphenyl-4-yloxy)pyridine (4 mmol scale)

A Schlenk tube was charged with Ni(COD)<sub>2</sub> (33 mg, 0.12 mmol), IPr·HCl (51 mg, 0.12 mmol), *i*-PrONa (0.492 g, 6 mmol), 2-([1,1'-biphenyl]-4-yloxy)pyridine (0.988 g, 4 mmol) and THF (8 cm<sup>3</sup>). The mixture was stirred at 60 °C for 2 h. Volatiles were removed by rotary evaporation. The residue was purified by column chromatography on silica gel (eluent: petroleum ether/EtOAc 60:1 v/v) to give 1,1'-biphenyl as a white solid, yield 0.527 g (86%).

### 4. Spectral data for the cross-coupling products

#### (1) 1,1'-biphenyl (**2a**)<sup>6</sup>

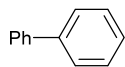

Eluent: petroleum ether/ethyl acetate = 60:1 (v/v). White solid, yield 30.8 mg (99%). <sup>1</sup>H NMR (400 MHz, CDCl<sub>3</sub>): δ 7.67 (d, *J* = 8.0 Hz, 4H), 7.51 (t, *J* = 7.5 Hz, 4H), 7.41 (t, *J* = 7.2 Hz, 2H). <sup>13</sup>C NMR (101 MHz, CDCl<sub>3</sub>): δ 141.34, 128.88, 127.38, 127.29.

#### (2) oxydibenzene (**2c**)<sup>6</sup>

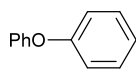

Eluent: petroleum ether/ethyl acetate = 60:1 (v/v). White solid, yield 31.1 mg (90%). <sup>1</sup>H NMR (400 MHz, CDCl<sub>3</sub>): δ 7.42–7.30 (m, 4H), 7.13 (t, *J* = 7.4 Hz, 2H), 7.08–6.99 (m, 4H). <sup>13</sup>C NMR (101 MHz, CDCl<sub>3</sub>): δ 157.38, 129.87, 123.34, 119.02.

#### (3) (benzyloxy)benzene (**2d**)<sup>6</sup>

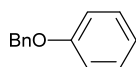

Eluent: petroleum ether/ethyl acetate = 60:1 (v/v). White solid, yield 36.0 mg (98%). <sup>1</sup>H NMR (400 MHz, CDCl<sub>3</sub>): δ 7.36 (d, *J* = 7.2 Hz, 2H), 7.30 (t, *J* = 7.3 Hz, 2H), 7.27–7.16 (m,

3H), 6.95–6.83 (m, 3H), 4.98 (s, 2H).  $^{13}\text{C}$  NMR (101 MHz,  $\text{CDCl}_3$ ):  $\delta$  158.89, 137.18, 129.62, 128.71, 128.07, 127.62, 121.06, 114.95, 70.01

(4) 4-fluoro-1,1'-biphenyl (**2f**)<sup>7</sup>

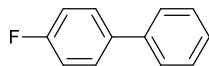

Eluent: petroleum ether/ethyl acetate = 60:1 (v/v). White solid, yield 29.5 mg (86%).  $^1\text{H}$  NMR (400 MHz,  $\text{CDCl}_3$ ):  $\delta$  7.59–7.50 (m, 4H), 7.44 (t,  $J$  = 7.6 Hz, 2H), 7.39–7.32 (m, 1H), 7.13 (t,  $J$  = 8.7 Hz, 2H).  $^{13}\text{C}$  NMR (101 MHz,  $\text{CDCl}_3$ ):  $\delta$  162.59 (d,  $J$  = 246.2 Hz), 140.39, 137.47 (d,  $J$  = 3.2 Hz), 128.96, 128.83 (d,  $J$  = 8.0 Hz), 127.40, 127.16, 115.75 (d,  $J$  = 21.4 Hz).  $^{19}\text{F}$  NMR (376 MHz,  $\text{CDCl}_3$ ):  $\delta$  –115.85.

(5) (*E*)-1,2-diphenylethene (**2g**)<sup>6</sup>

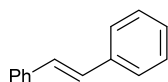

Eluent: petroleum ether/ethyl acetate = 60:1 (v/v). White solid, yield 35.5 mg (99%).  $^1\text{H}$  NMR (400 MHz,  $\text{CDCl}_3$ ):  $\delta$  7.57–7.46 (m, 4H), 7.35 (t,  $J$  = 7.6 Hz, 4H), 7.29–7.21 (m, 2H), 7.11 (s, 2H).  $^{13}\text{C}$  NMR (101 MHz,  $\text{CDCl}_3$ ):  $\delta$  137.43, 128.81, 127.75, 126.64.

(6) *N*-phenylacetamide (**2h**)<sup>6</sup>

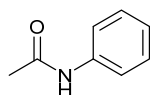

Eluent: petroleum ether/ethyl acetate = 1:1 (v/v). White solid, yield 24.2 mg (90%).  $^1\text{H}$  NMR (400 MHz,  $\text{CDCl}_3$ ):  $\delta$  7.99–7.62 (br, 1H), 7.50 (d,  $J$  = 8.0 Hz, 2H), 7.29 (t,  $J$  = 7.6 Hz, 2H), 7.09 (t,  $J$  = 7.2 Hz, 1H), 2.15 (s, 3H).  $^{13}\text{C}$  NMR (101 MHz,  $\text{CDCl}_3$ ):  $\delta$  168.87, 138.06, 129.03, 124.39, 120.13, 24.60.

(7) *tert*-butyl methyl(phenyl)carbamate (**2i**)<sup>6</sup>

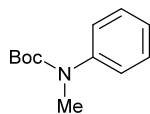

Eluent: petroleum ether/ethyl acetate = 5:1 (v/v). Colorless oil, yield 28.9 mg (70%).  $^1\text{H}$  NMR (400 MHz,  $\text{CDCl}_3$ ):  $\delta$  7.25 (t,  $J$  = 7.8 Hz, 2H), 7.16 (d,  $J$  = 7.6 Hz, 2H), 7.09 (t,  $J$  = 7.2

Hz, 1H), 3.19 (s, 3H), 1.38 (s, 9H).  $^{13}\text{C}$  NMR (101 MHz,  $\text{CDCl}_3$ ):  $\delta$  154.92, 143.93, 128.67, 125.65, 125.50, 80.34, 37.44, 28.44.

(8) benzophenone (**2k**)<sup>8</sup>

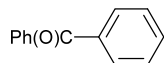

Eluent: petroleum ether/ethyl acetate = 20:1 (v/v). White solid, yield 35.7 mg (98%).  $^1\text{H}$  NMR (400 MHz,  $\text{CDCl}_3$ ):  $\delta$  7.86–7.76 (m, 4H), 7.59 (t,  $J$  = 7.4 Hz, 2H), 7.48 (t,  $J$  = 7.6 Hz, 4H).  $^{13}\text{C}$  NMR (101 MHz,  $\text{CDCl}_3$ ):  $\delta$  196.91, 137.69, 132.55, 130.19, 128.40.

(9) *N,N*-diethylbenzamide (**2l**)<sup>9</sup>

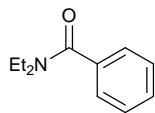

Eluent: petroleum ether/ethyl acetate = 2:1 (v/v). Colorless oil, yield 29.0 mg (82%).  $^1\text{H}$  NMR (400 MHz,  $\text{CDCl}_3$ ):  $\delta$  7.45–7.28 (m, 5H), 3.54 (br, 2H), 3.24 (br, 2H), 1.24 (br, 3H), 1.09 (br, 3H).  $^{13}\text{C}$  NMR (101 MHz,  $\text{CDCl}_3$ ):  $\delta$  171.39, 137.36, 129.17, 128.49, 126.34, 43.36, 39.30, 14.31, 13.00.

(10) 4-methyl-1,1'-biphenyl (**4a**)<sup>10</sup>

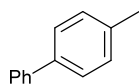

Eluent: petroleum ether/ethyl acetate = 60:1 (v/v). White solid, yield 27.7 mg (83%).  $^1\text{H}$  NMR (400 MHz,  $\text{CDCl}_3$ ):  $\delta$  7.65–7.58 (m, 2H), 7.53 (d,  $J$  = 8.1 Hz, 2H), 7.45 (t,  $J$  = 7.6 Hz, 2H), 7.35 (t,  $J$  = 7.4 Hz, 1H), 7.28 (d,  $J$  = 7.9 Hz, 2H), 2.43 (s, 3H).  $^{13}\text{C}$  NMR (101 MHz,  $\text{CDCl}_3$ ):  $\delta$  141.29, 138.48, 137.16, 129.62, 128.85, 127.13, 127.11, 21.25.

(11) 2-methylnaphthalene (**4d**)<sup>11</sup>

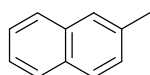

Eluent: petroleum ether/ethyl acetate = 60:1 (v/v). White solid, yield 23.4 mg (83%).  $^1\text{H}$  NMR (400 MHz,  $\text{CDCl}_3$ ):  $\delta$  7.84 (d,  $J$  = 7.8 Hz, 1H), 7.82–7.75 (m, 2H), 7.65 (s, 1H), 7.53–7.41 (m, 2H), 7.36 (dd,  $J$  = 8.4, 1.4 Hz, 1H), 2.56 (s, 3H).  $^{13}\text{C}$  NMR (101 MHz,  $\text{CDCl}_3$ ):  $\delta$  135.56, 133.79, 131.82, 128.24, 127.82, 127.73, 127.36, 126.96, 125.99, 125.08, 21.85.

(12) 6-methylquinoline (**4e**)<sup>12</sup>

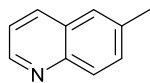

Eluent: petroleum ether/ethyl acetate = 5:1 (v/v). Colorless oil, yield 24.1 mg (84%). <sup>1</sup>H NMR (400 MHz, CDCl<sub>3</sub>): δ 8.84 (dd, *J* = 4.2, 1.5 Hz, 1H), 8.05 (d, *J* = 8.1 Hz, 1H), 8.00 (d, *J* = 8.5 Hz, 1H), 7.61 – 7.49 (2 H, m), 7.34 (dd, *J* = 8.3, 4.2 Hz, 1H), 2.53 (s, 3H). <sup>13</sup>C NMR (101 MHz, CDCl<sub>3</sub>): δ 149.63, 146.98, 136.51, 135.51, 131.87, 129.18, 128.43, 126.70, 121.18, 21.69.

(13) diphenylmethane (**4f**)<sup>13</sup>

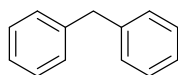

Performed on 0.4 mmol scale. Eluent: petroleum ether/ethyl acetate = 60:1 (v/v). White solid, yield 25.1 mg (31%). <sup>1</sup>H NMR (400 MHz, CDCl<sub>3</sub>): δ 7.33–7.24 (m, 4H), 7.22–7.14 (m, 6H), 3.98 (s, 2H). <sup>13</sup>C NMR (101 MHz, CDCl<sub>3</sub>): δ 141.25, 129.07, 128.59, 126.20, 42.08.

## II. Reaction mechanism

### (1) Deuterium labeling experiment

A Schlenk tube was charged with Ni(COD)<sub>2</sub> (1.7 mg, 0.006 mmol), IPr·HCl (2.6 mg, 0.006 mmol), (CD<sub>3</sub>)<sub>2</sub>CDONa (27 mg, 0.30 mmol), 2-([1,1'-biphenyl]-4-yloxy)pyridine (49.4 mg, 0.2 mmol) and THF (1 cm<sup>3</sup>). The mixture was stirred at 60 °C for 2 h. Volatiles were removed by rotary evaporation. The residue was purified by preparative thin-layer chromatography (developing solvent: petroleum ether/EtOAc = 60:1 v/v) to give the reductive product as a white solid, yield 28.4 mg (92%). The deuterium content at the initial position of C-O bond was approximately 93% determined by <sup>1</sup>H NMR spectroscopy (Figure S1).

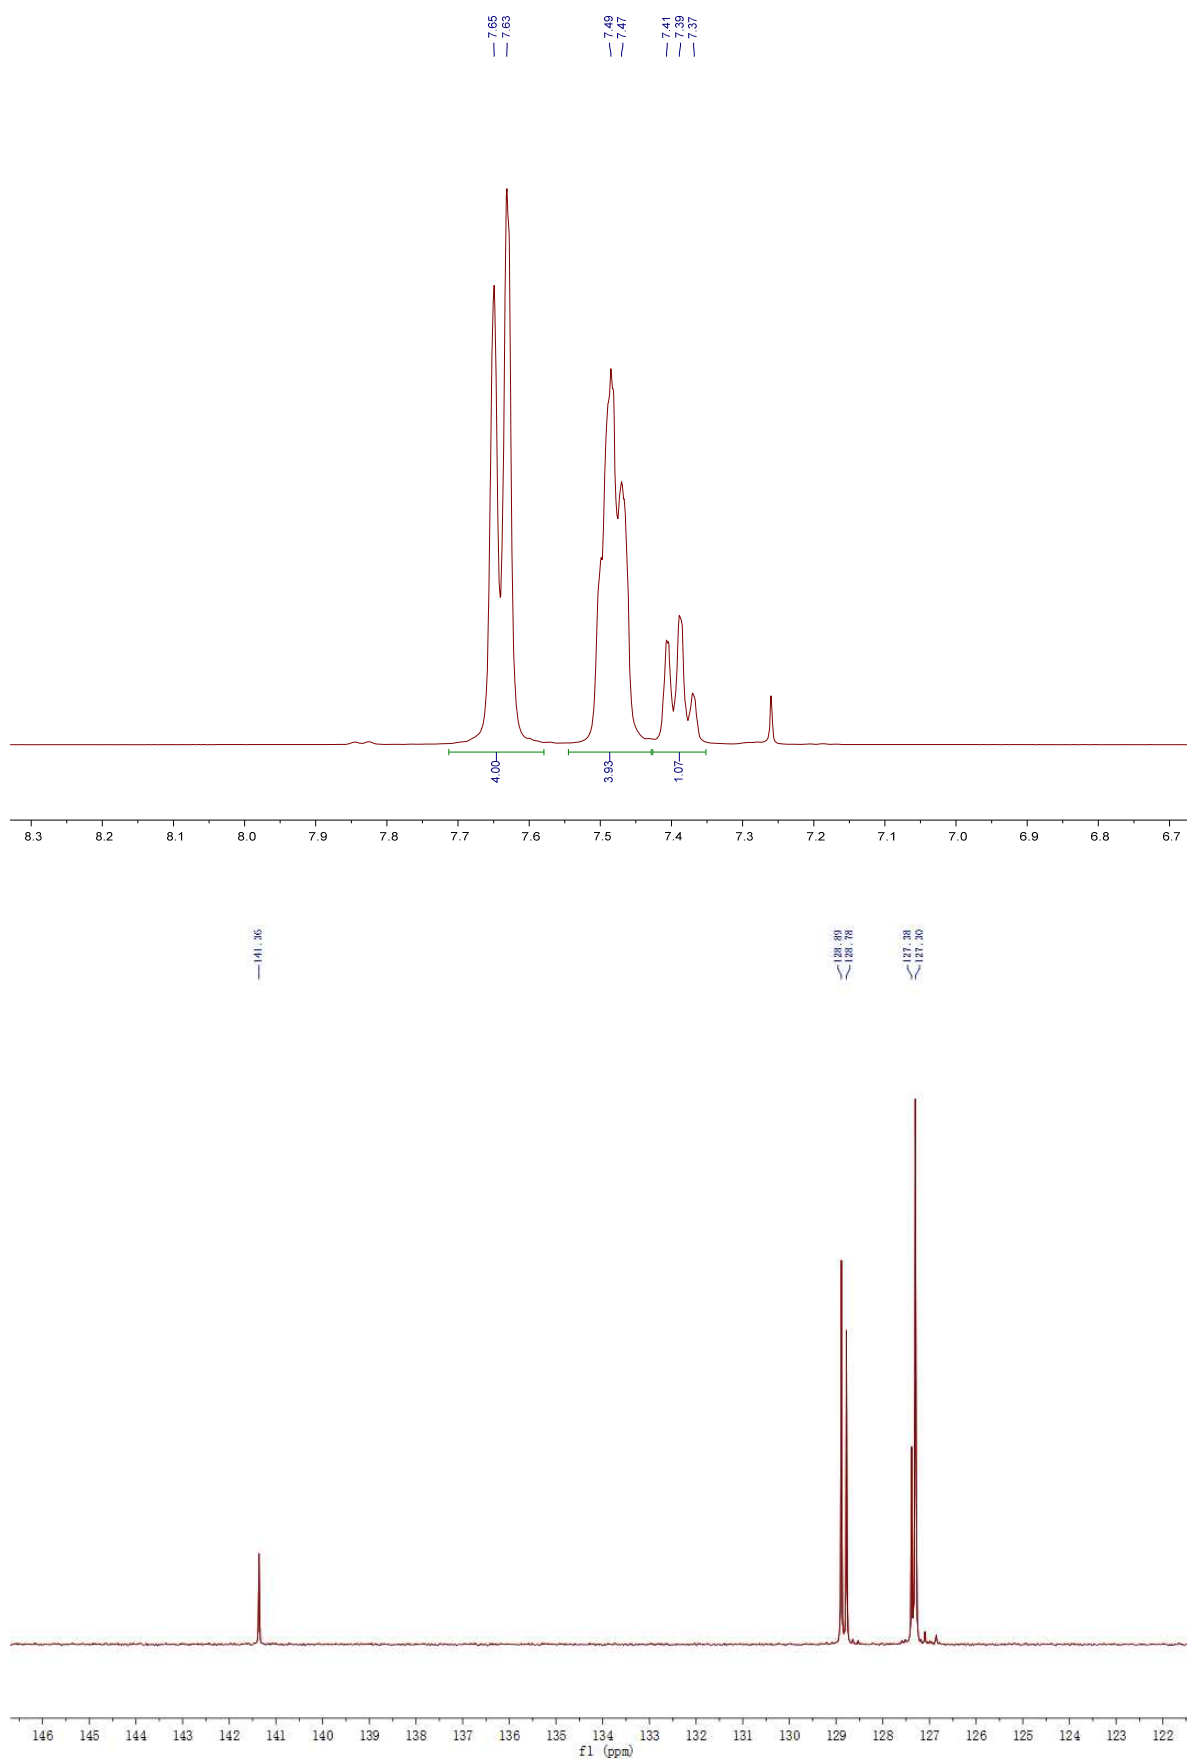

**Figure S1**  $^1\text{H}$  and  $^{13}\text{C}$  NMR spectra of 1,1'-biphenyl-4-d.

## (2) Kinetic isotope effect experiment

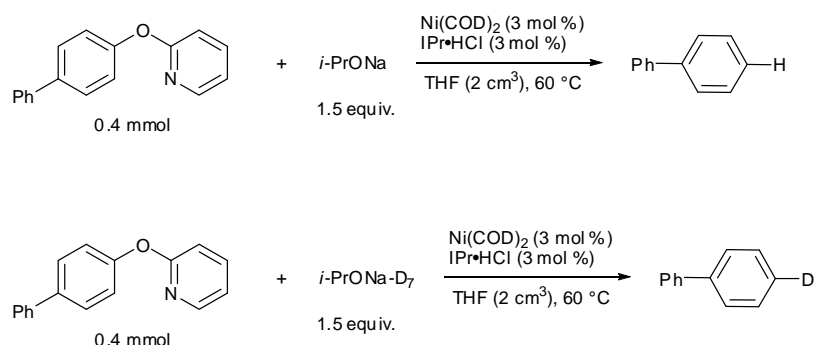

A Schlenk tube was charged with  $\text{Ni(COD)}_2$  (3.3 mg, 0.012 mmol),  $\text{IPr}\cdot\text{HCl}$  (5.2 mg, 0.012 mmol),  $i\text{-PrONa}$  (49.2 mg, 0.60 mmol), 2-([1,1'-biphenyl]-4-yloxy)pyridine (98.8 mg, 0.4 mmol), THF (2 cm<sup>3</sup>) and dodecane (30  $\mu\text{l}$ ). The mixture was stirred at 60 °C. A 0.1 cm<sup>3</sup> aliquot was taken from the reaction mixture at 3, 6, 9, and 12 min., which were separately quenched with  $\text{H}_2\text{O}$  (1 cm<sup>3</sup>) and diluted with  $\text{EtOAc}$  (3 cm<sup>3</sup>). The GC yields were determined using dodecane as an internal standard. The reaction with  $i\text{-PrONa-D}_7$  was carried out and monitored under exact same conditions. The experimental results are showed in Figure S2. The calculated KIE value is 1.41.

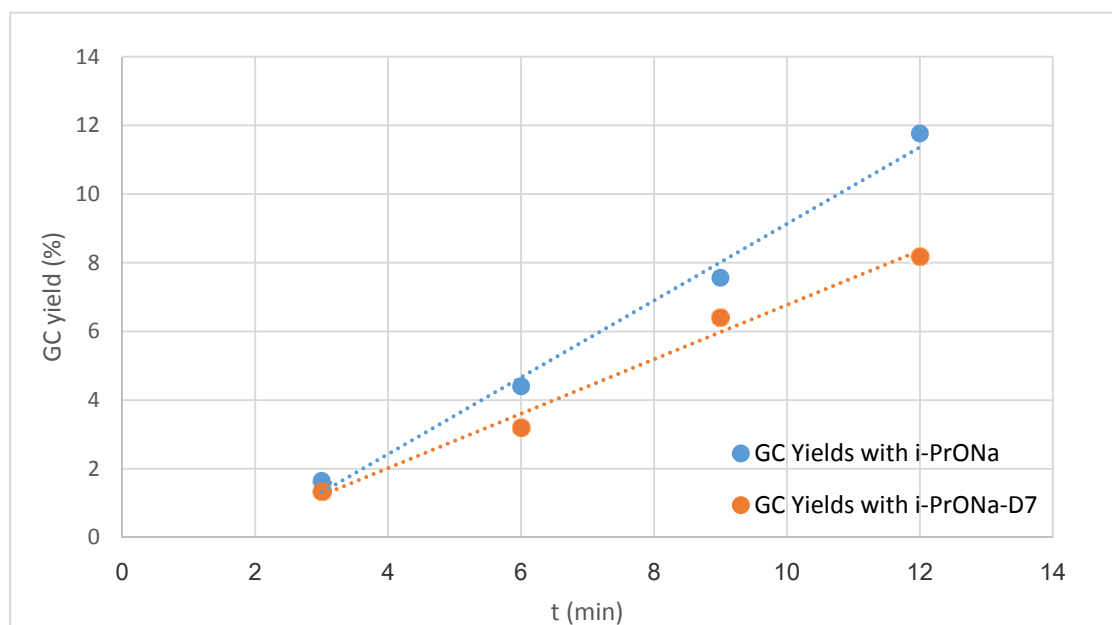

**Figure S2** Intermolecular parallel KIE experiment with  $i\text{-PrONa}$  and  $i\text{-PrONa-D}_7$ .

For group with  $i\text{-PrONa}$ ,  $y = 1.117x - 2.0345$ ,  $R^2 = 0.990$ ; For group with  $i\text{-PrONa-D}_7$ ,  $y = 0.7915x - 1.1399$ ,  $R^2 = 0.9858$ . Thus KIE value is 1.41.



## References

- 1 L. Skatteböl, E. R. H. Jones and M. C. Whiting, *Org. Synth.*, Coll. Vol. 4, 1963, p 792
- 2 T. Fujimoto and T. Ritter, *Org. Lett.*, 2015, **17**, 544.
- 3 H. Kinuta, M. Tobisu and N. Chatani, *J. Am. Chem. Soc.*, 2015, **137**, 1593. M. Tobisu, J. Zhao, H. Kinuta, T. Furukawa, T. Igarashi and N. Chatani, *Adv. Synth. Catal.*, 2016, **358**, 2417.
- 4 J. Li and Z.-X. Wang, *Org. Lett.*, 2017, **19**, 3723.
- 5 (a) C. D. Gabbutt, C. Kilner, S. B. Kolla, *Dyes Pigm.*, 2012, **92**, 825; (b) M. Chen, X. Hu and M. Fu, *J. Surfact. Deterg.*, 2013, **16**, 581; (c) D. L. Jameson, S. E. Hilgen, C. E. Hummel and S. L. Pichla, *Tetrahedron Lett.*, 1989, **30**, 1609.
- 6 Y.-Q.-Q. Yi, W.-C. Yang, D.-D. Zhai, X.-Y. Zhang, S.-Q. Li and B.-T. Guan, *Chem. Commun.*, 2016, **52**, 10894.
- 7 Z. Peng, G. Hu, H. Qiao, P. Xu, Y. Gao and Y. Zhao, *J. Org. Chem.*, 2014, **79**, 2733.
- 8 S. Seo, J. B. Taylor and M. F. Greaney, *Chem. Commun.*, 2012, **48**, 8270.
- 9 S. C. Ghosh, J. S. Y. Ngiam, A. M. Seayad, D. T. Tuan, C. L. L. Chai and A. Chen, *J. Org. Chem.*, 2012, **77**, 8007.
- 10 H. Liu, B. Yin, Z. Gao, Y. Li and H. Jiang, *Chem. Commun.*, 2012, **48**, 2033.
- 11 T. Patra, S. Agasti, A. Modak and D. Maiti, *Chem. Commun.*, 2013, **49**, 8362.
- 12 D. Jung, M. H. Kim and J. Kim, *Org. Lett.*, 2016, **18**, 6300.
- 13 H. Wang, L. Li, X.-F. Bai, J.-Y. Shang, K.-F. Yang and L.-W. Xu, *Adv. Synth. Catal.*, 2013, **355**, 341.

### III. Copies of NMR spectra

(1) 1,1'-biphenyl (**2a**)

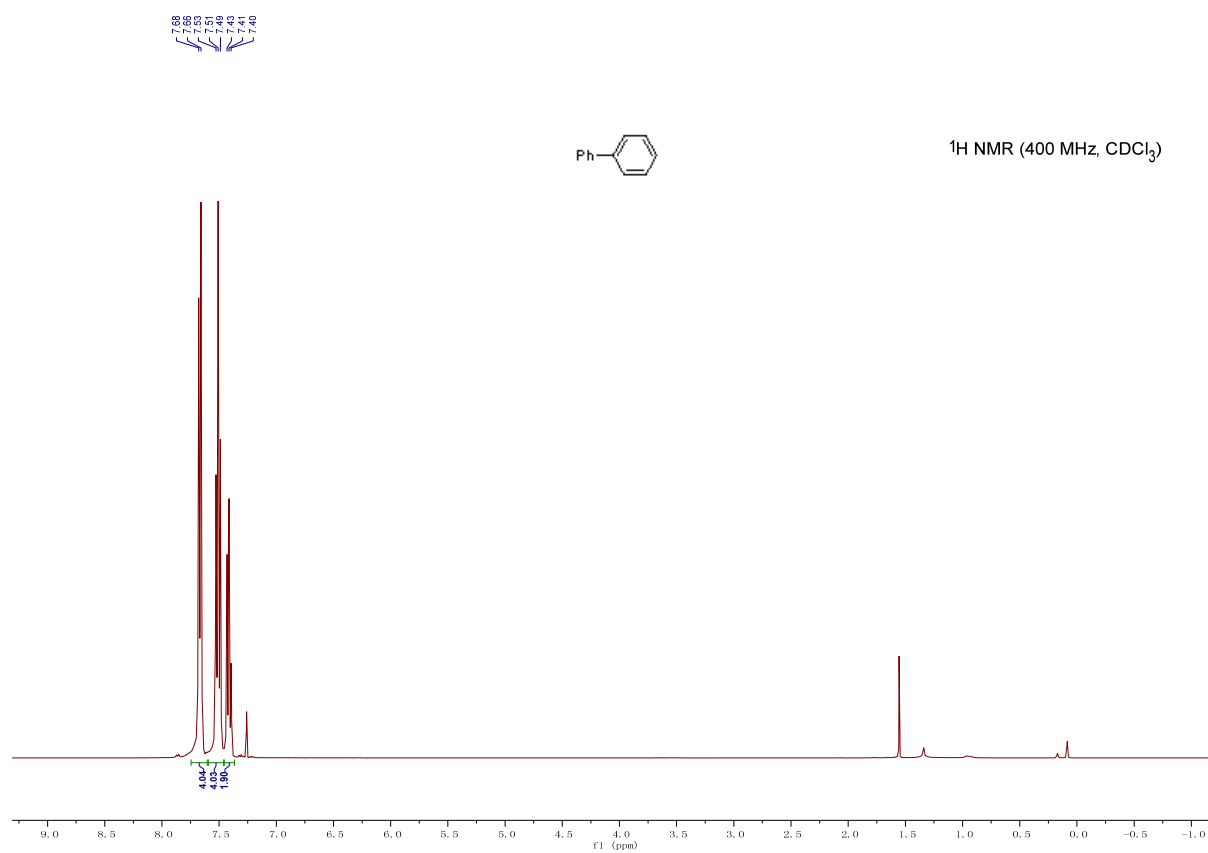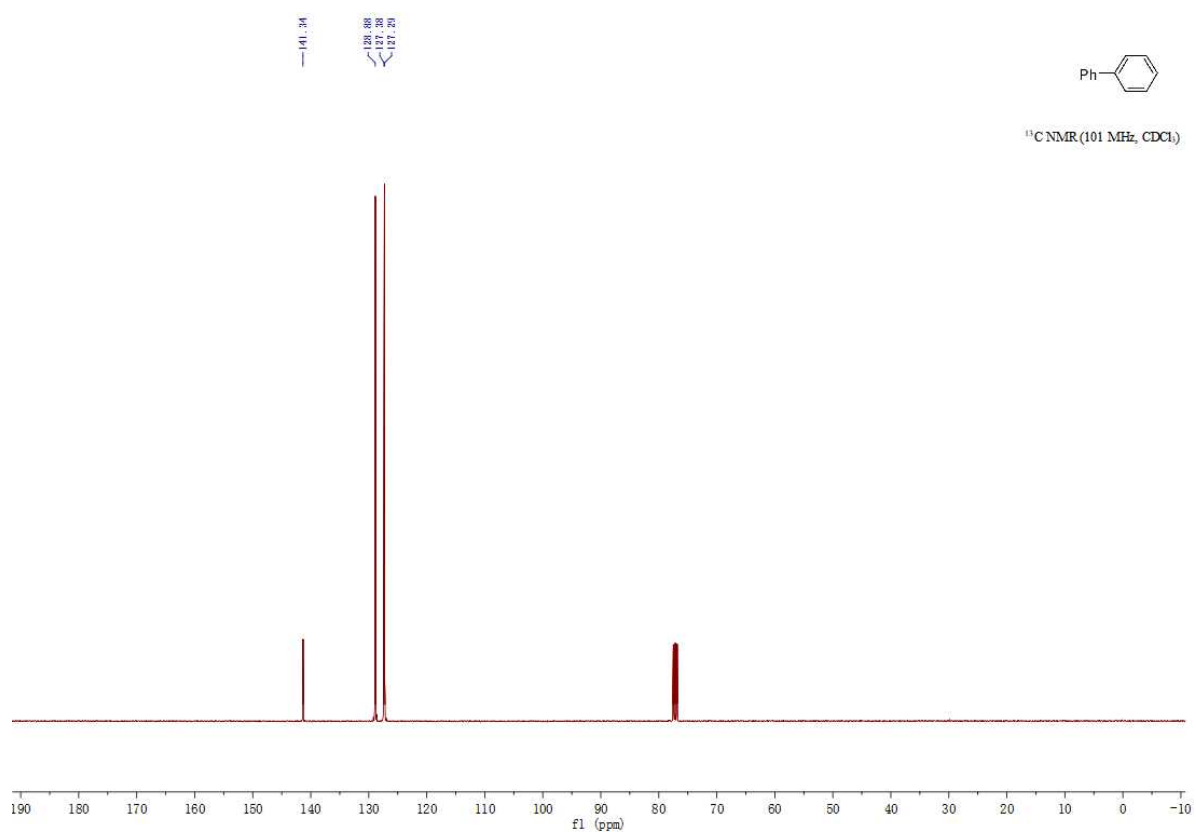

(2) oxydibenzene (**2c**)

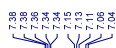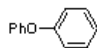

<sup>1</sup>H NMR (400 MHz, CDCl<sub>3</sub>)

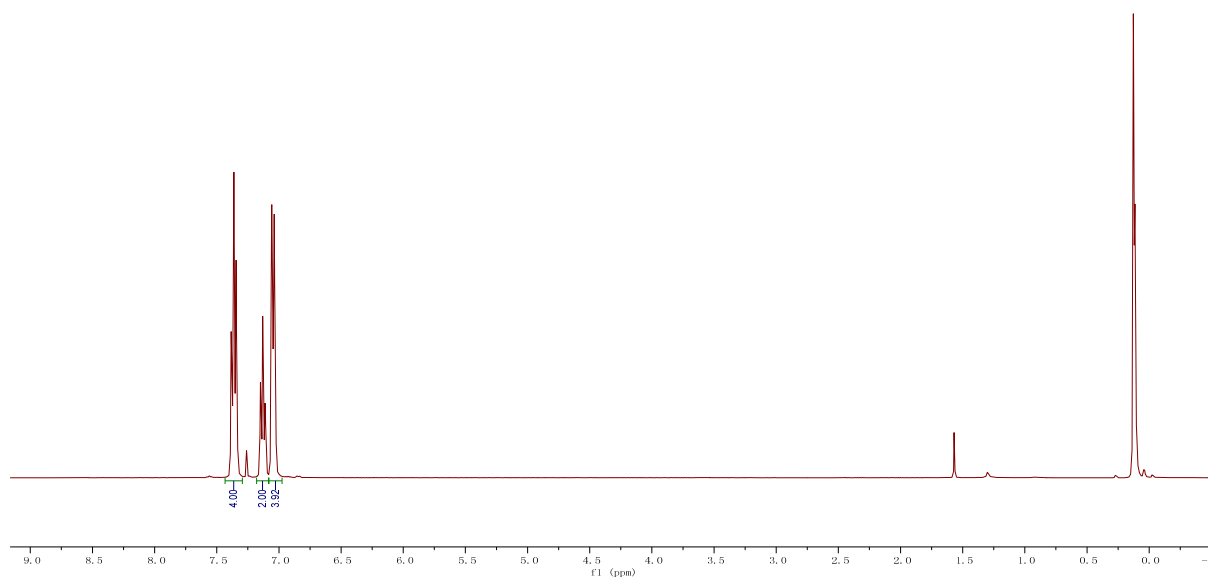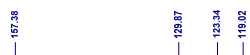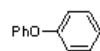

<sup>13</sup>C NMR (101 MHz, CDCl<sub>3</sub>)

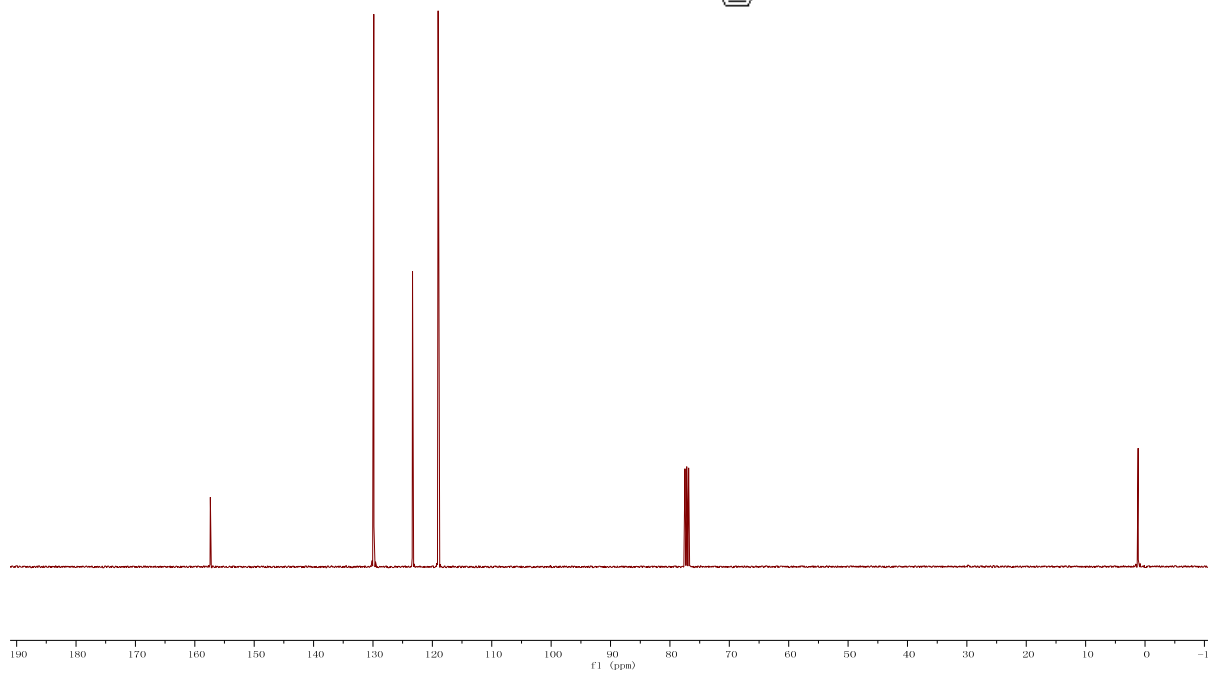

### (3) (benzyloxy)benzene (**2d**)

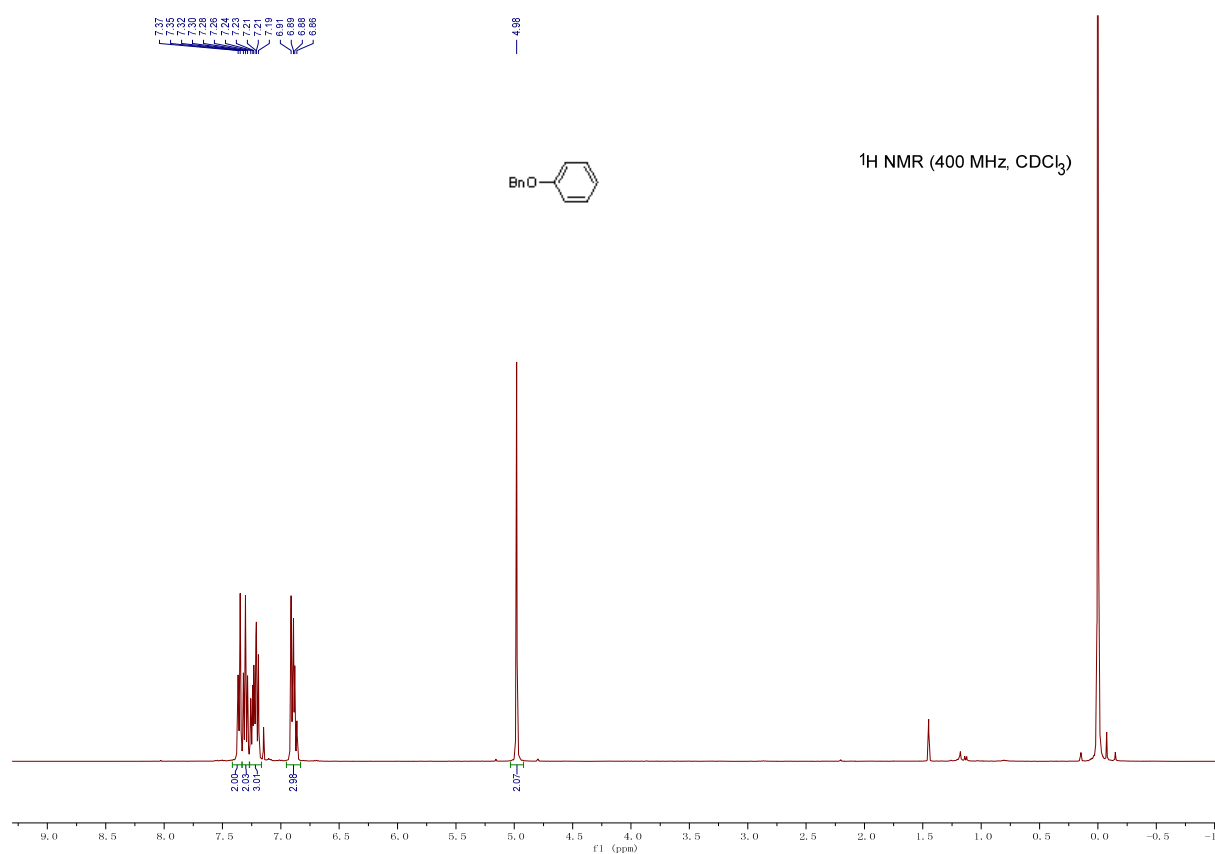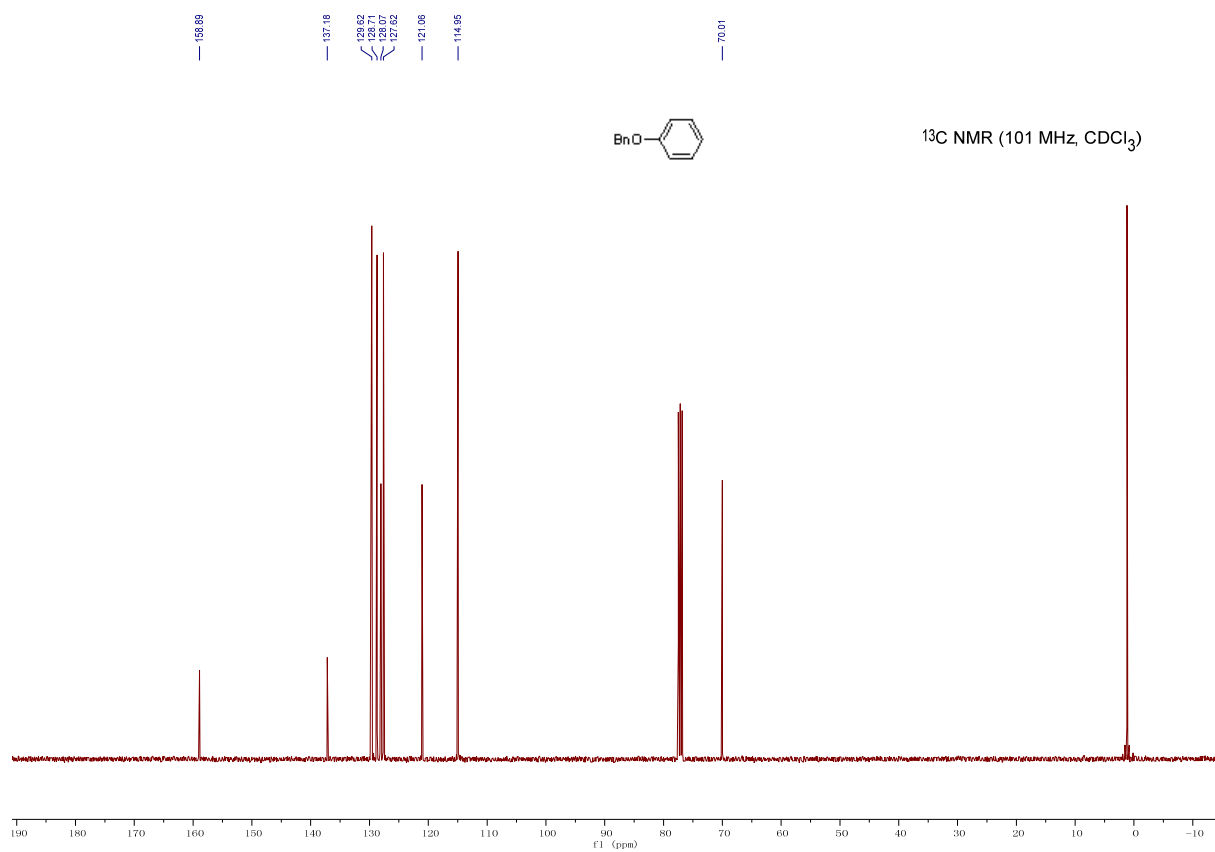

(4) 4-fluoro-1,1'-biphenyl (**2f**)

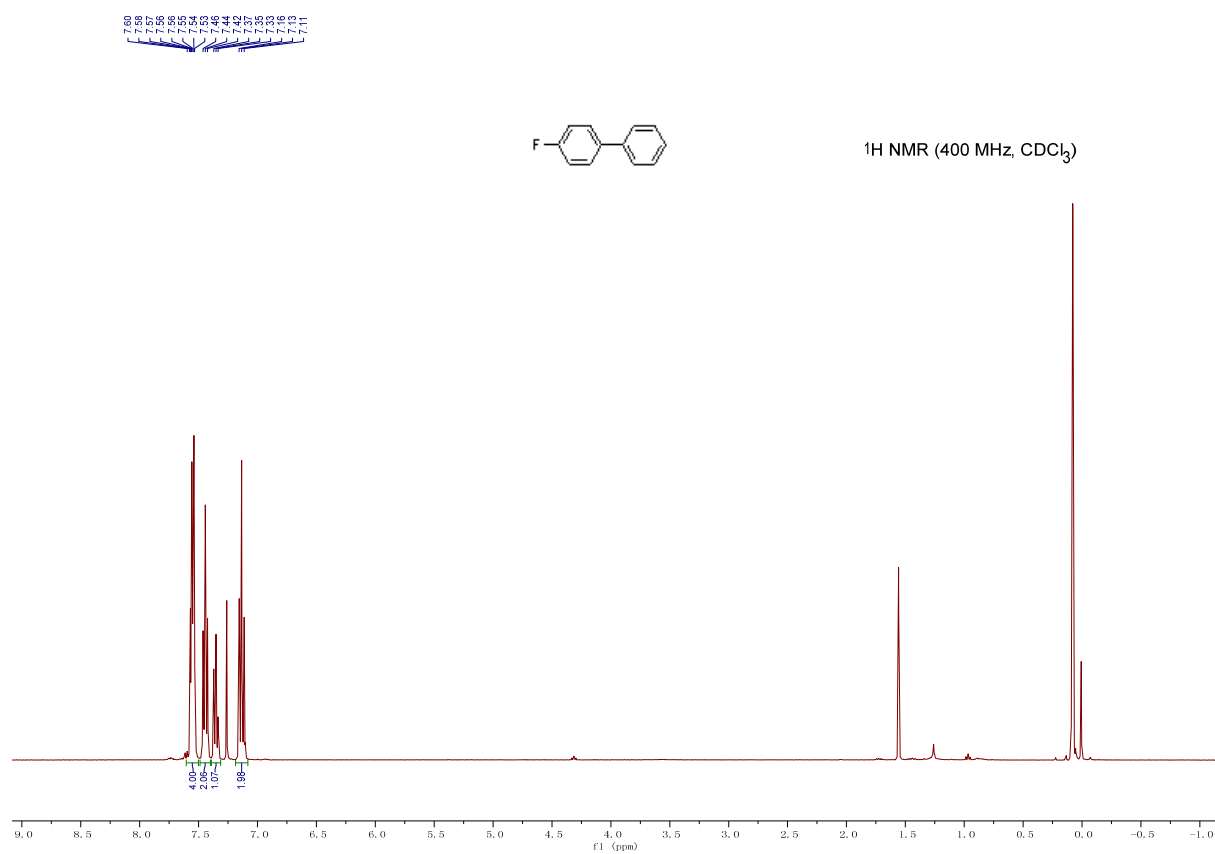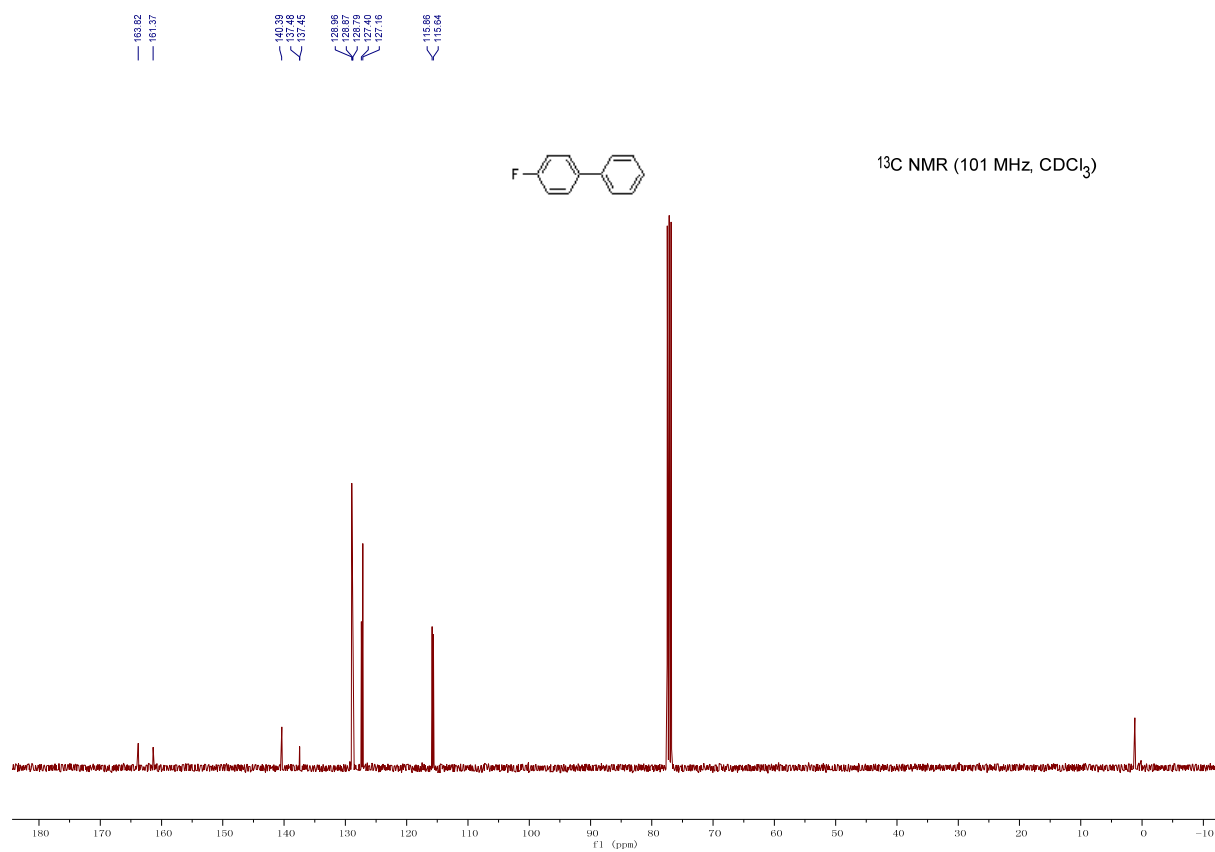

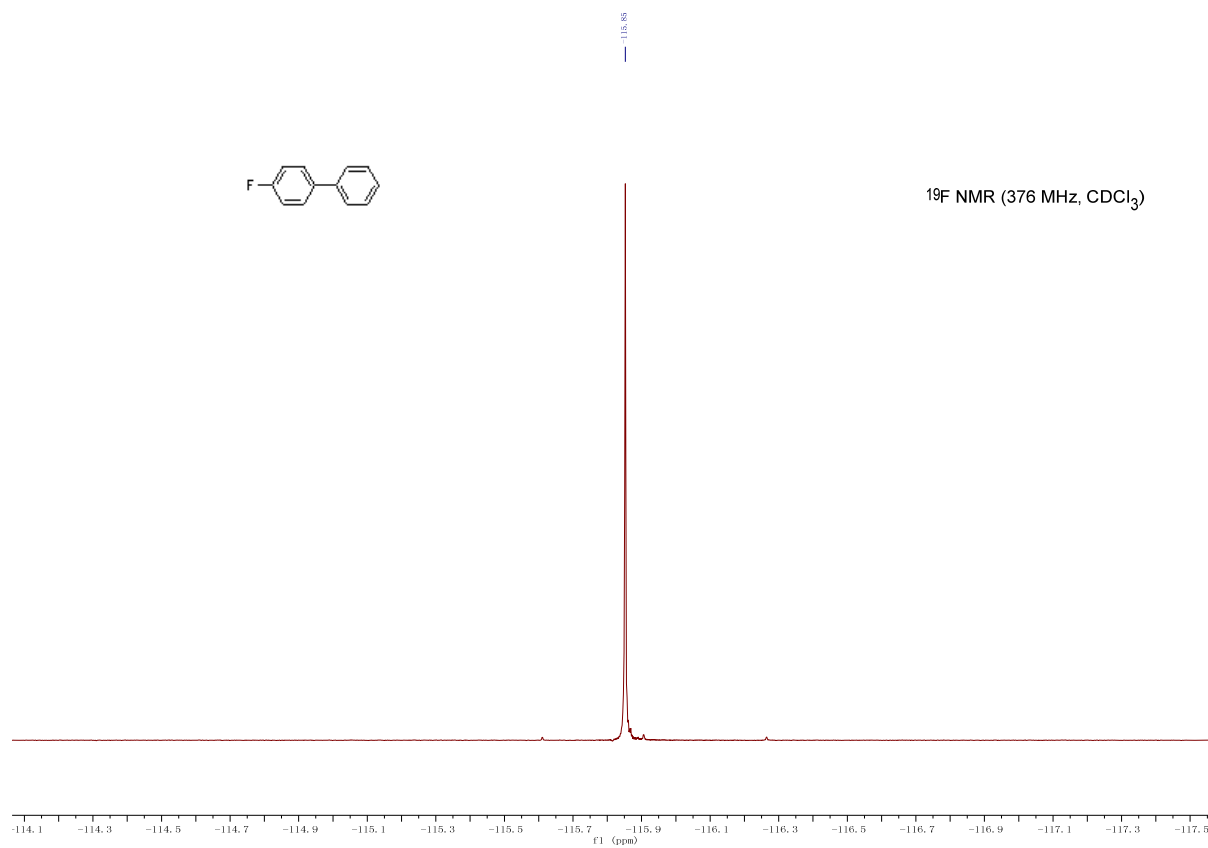

(5) (*E*)-1,2-diphenylethene (**2g**)

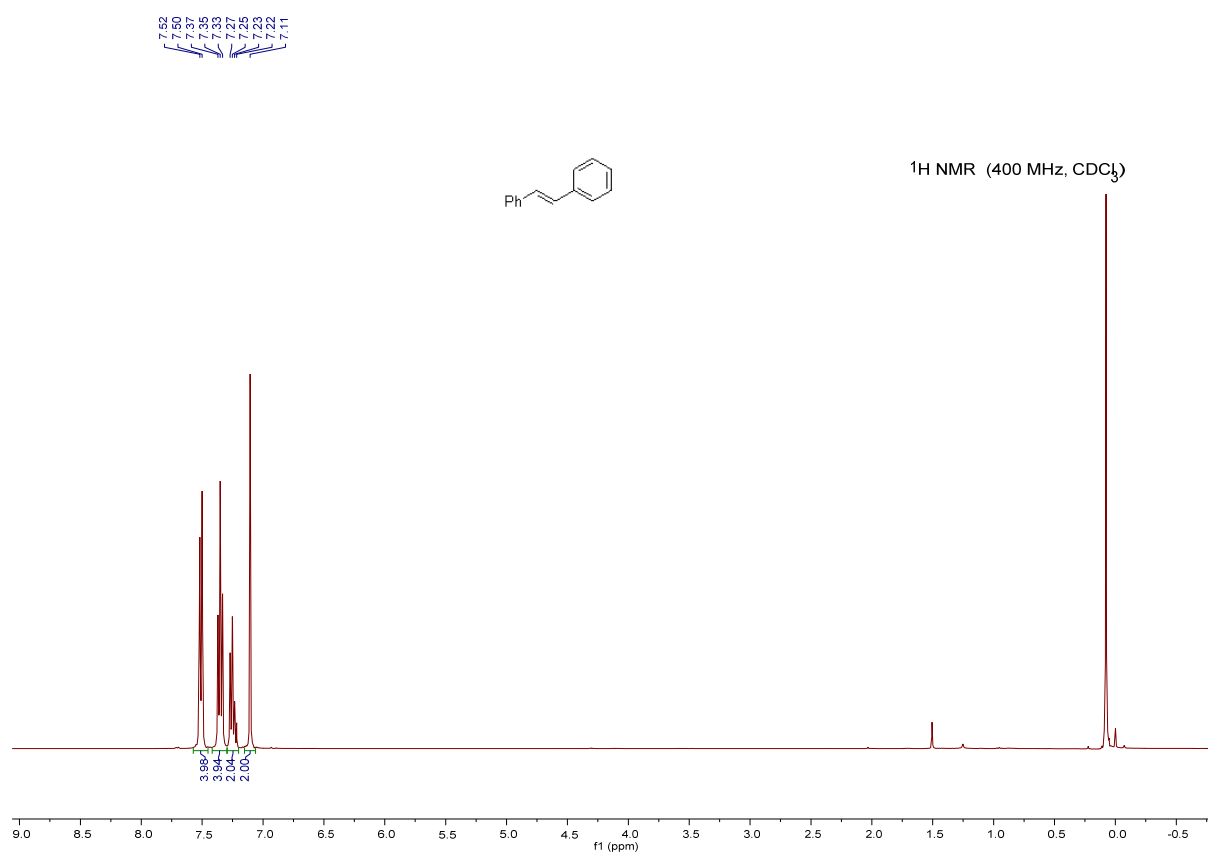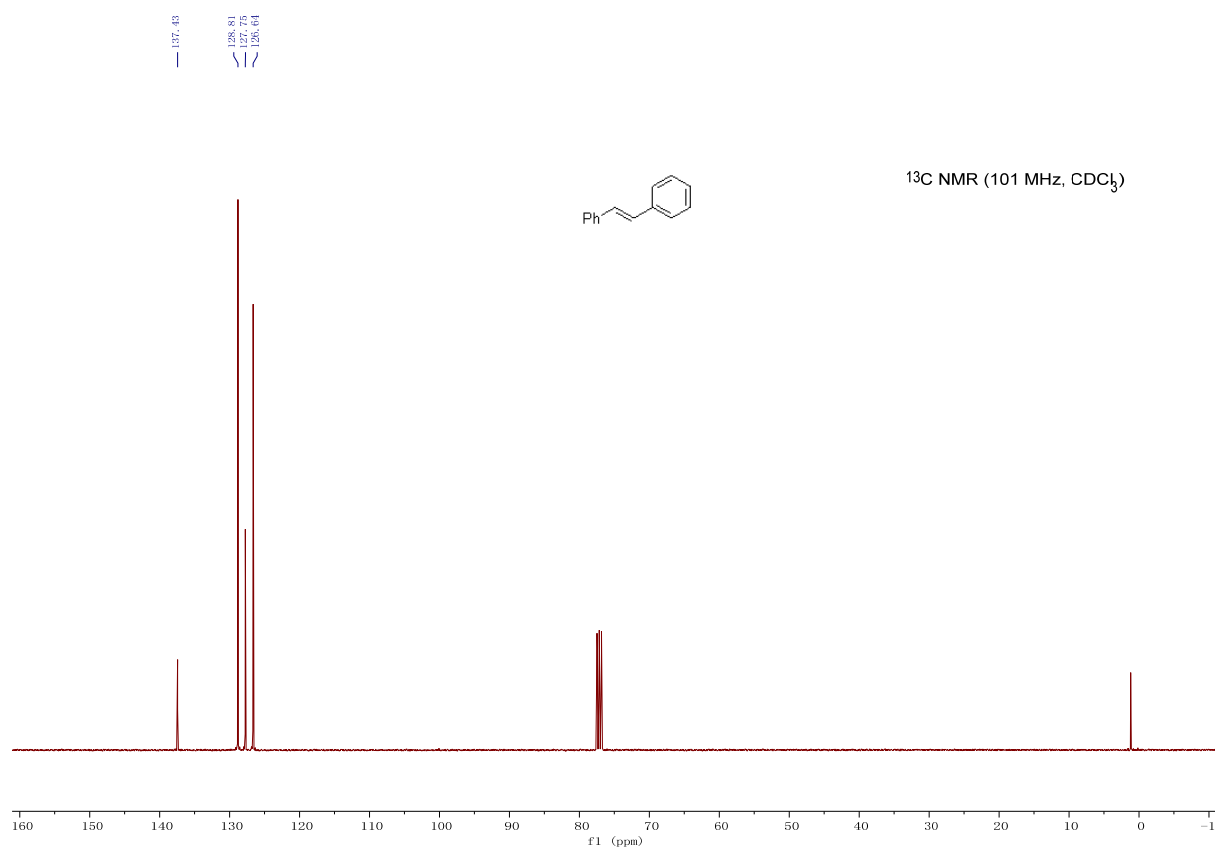

(6) *N*-phenylacetamide (**2h**)

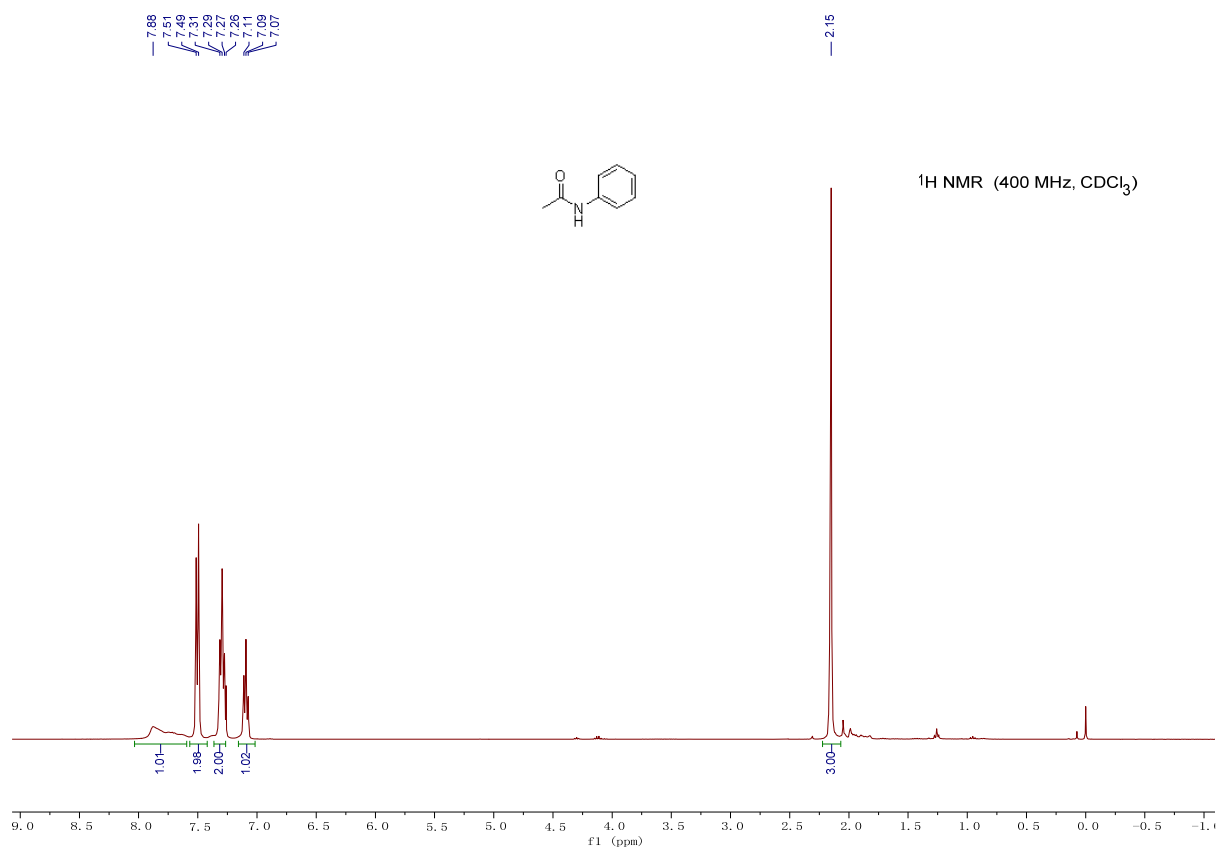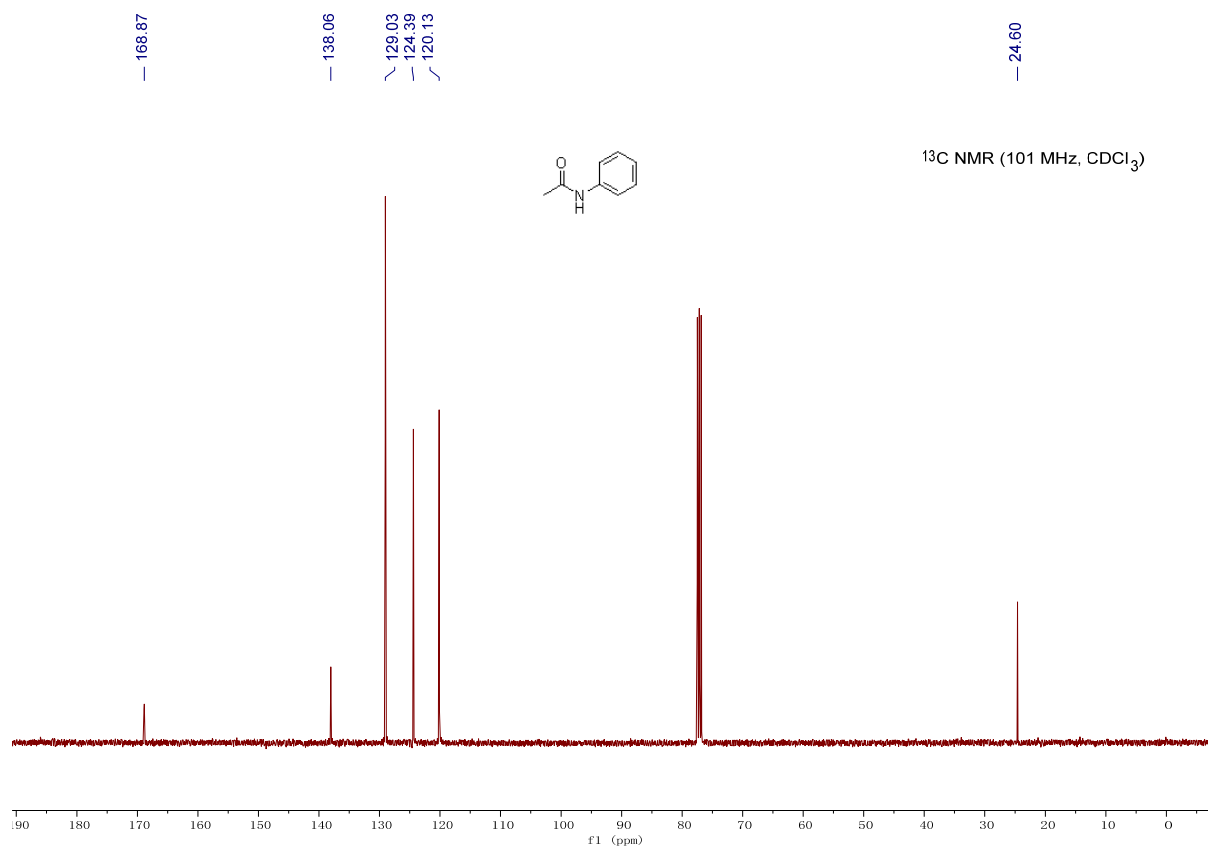



(7) *tert*-butyl methyl(phenyl)carbamate (**2i**)

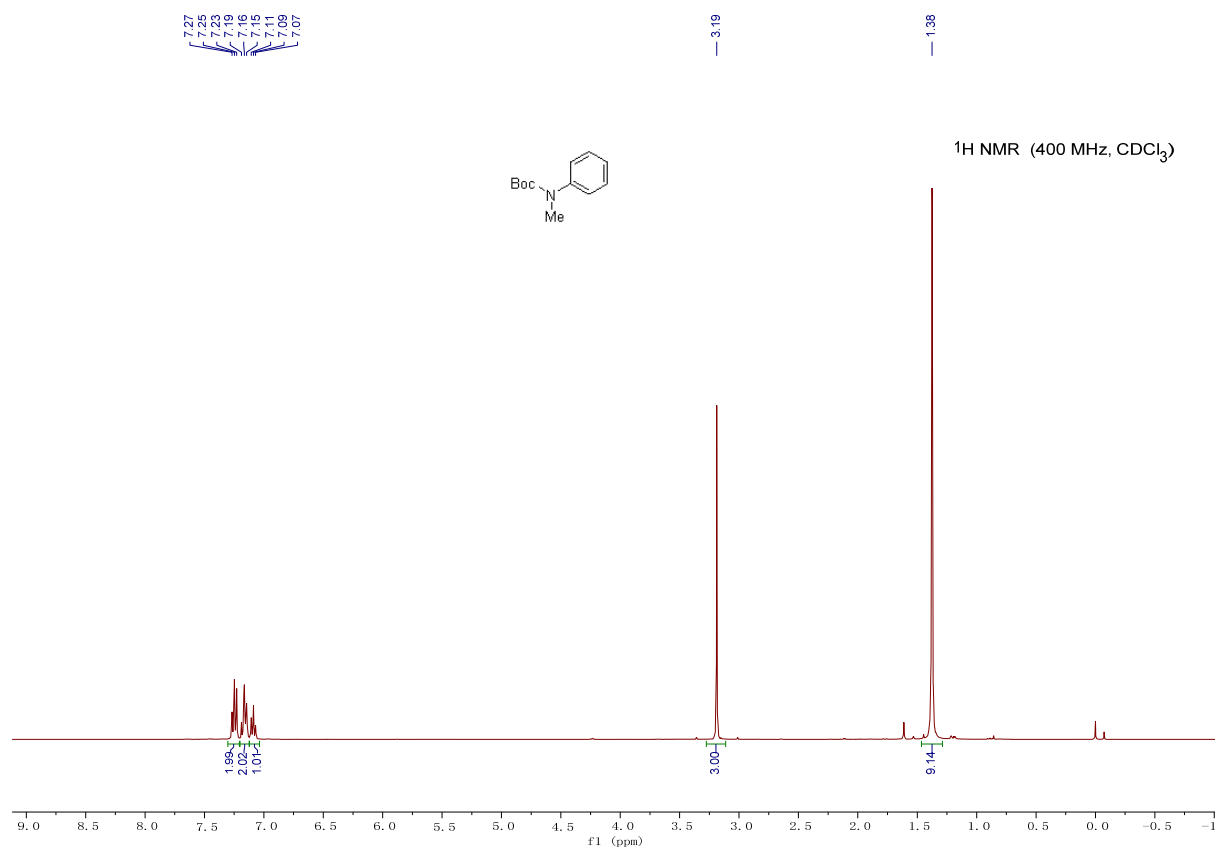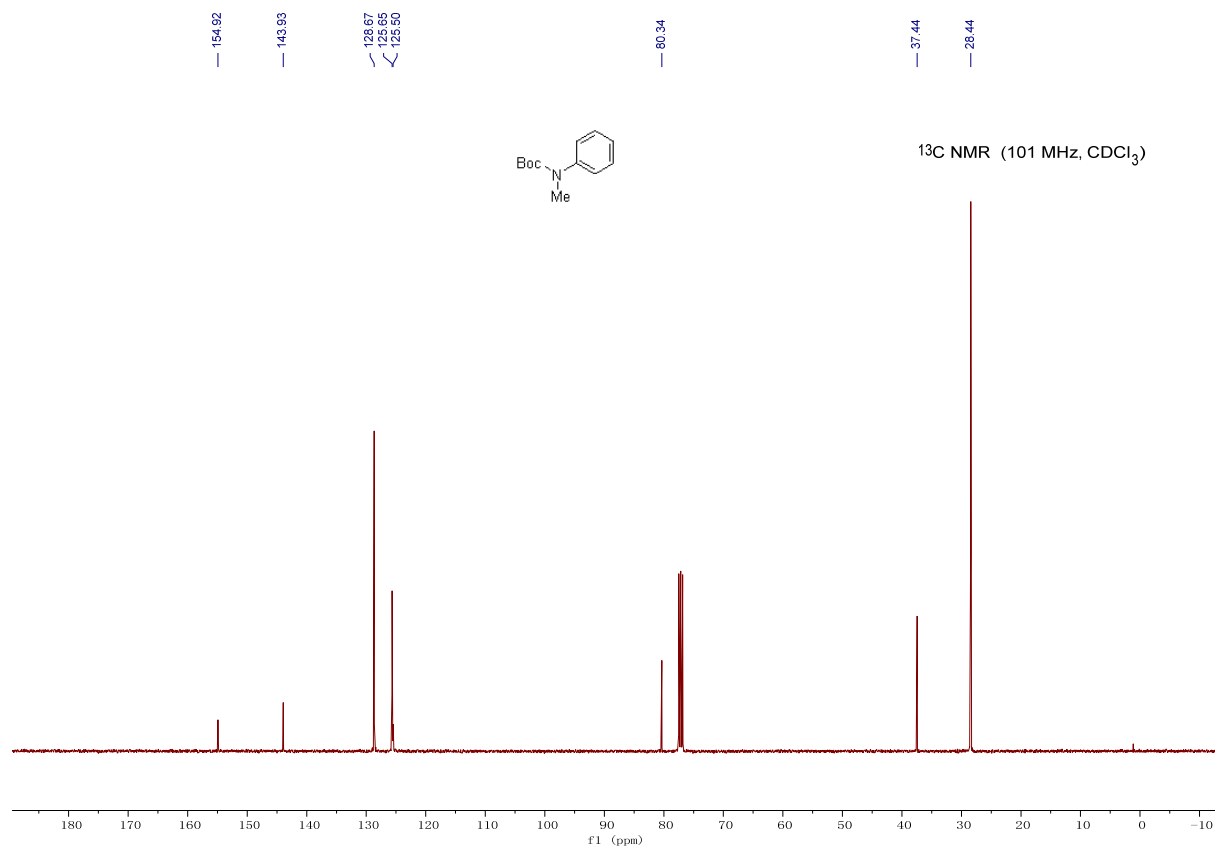

(8) benzophenone (**2k**)

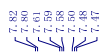

<sup>1</sup>H NMR (400 MHz, CDCl<sub>3</sub>)

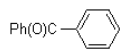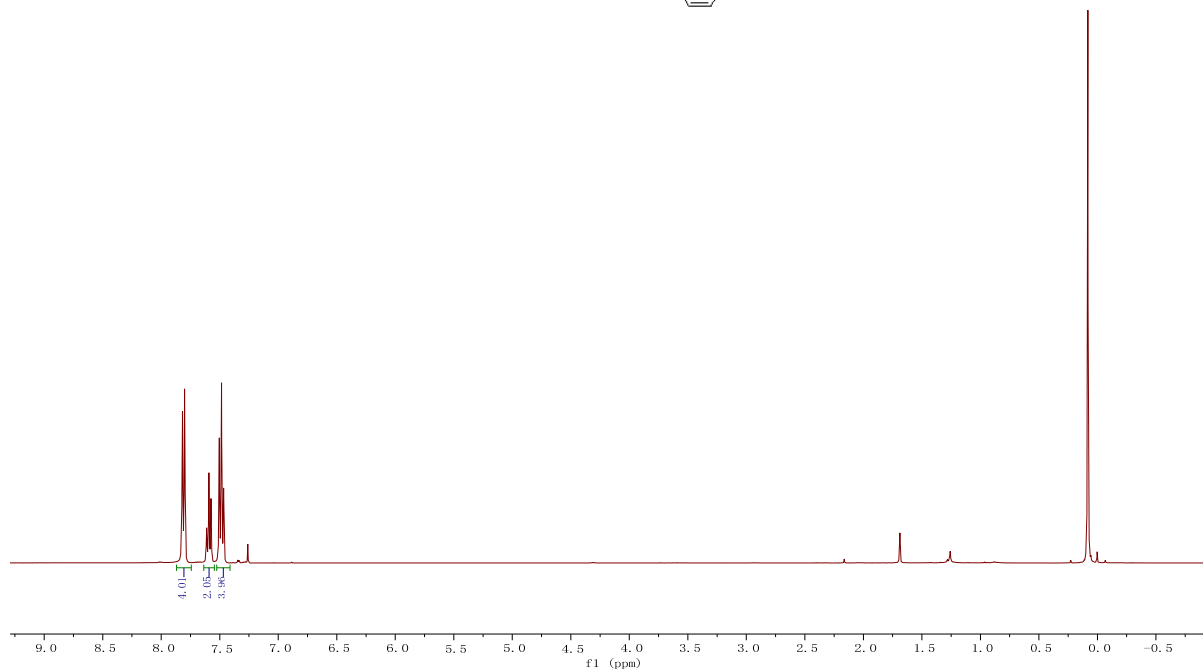

186.91

137.69  
132.55  
130.19  
128.40

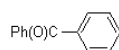

<sup>13</sup>C NMR (101 MHz, CDCl<sub>3</sub>)

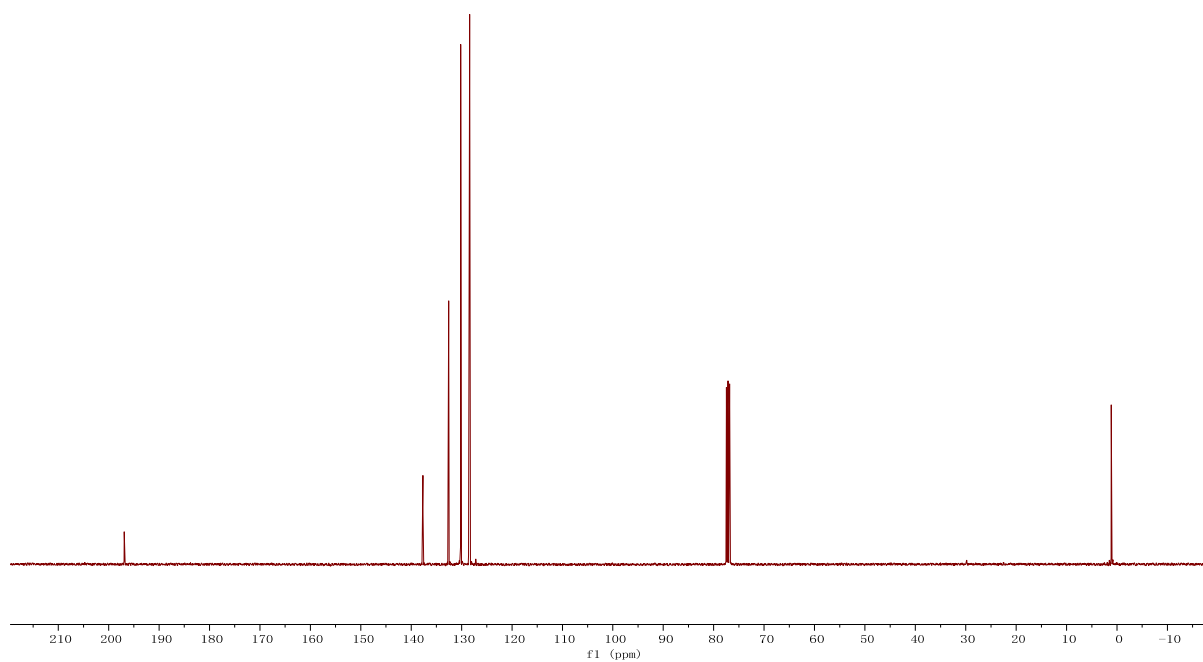

(9) *N,N*-diethylbenzamide (**2l**)

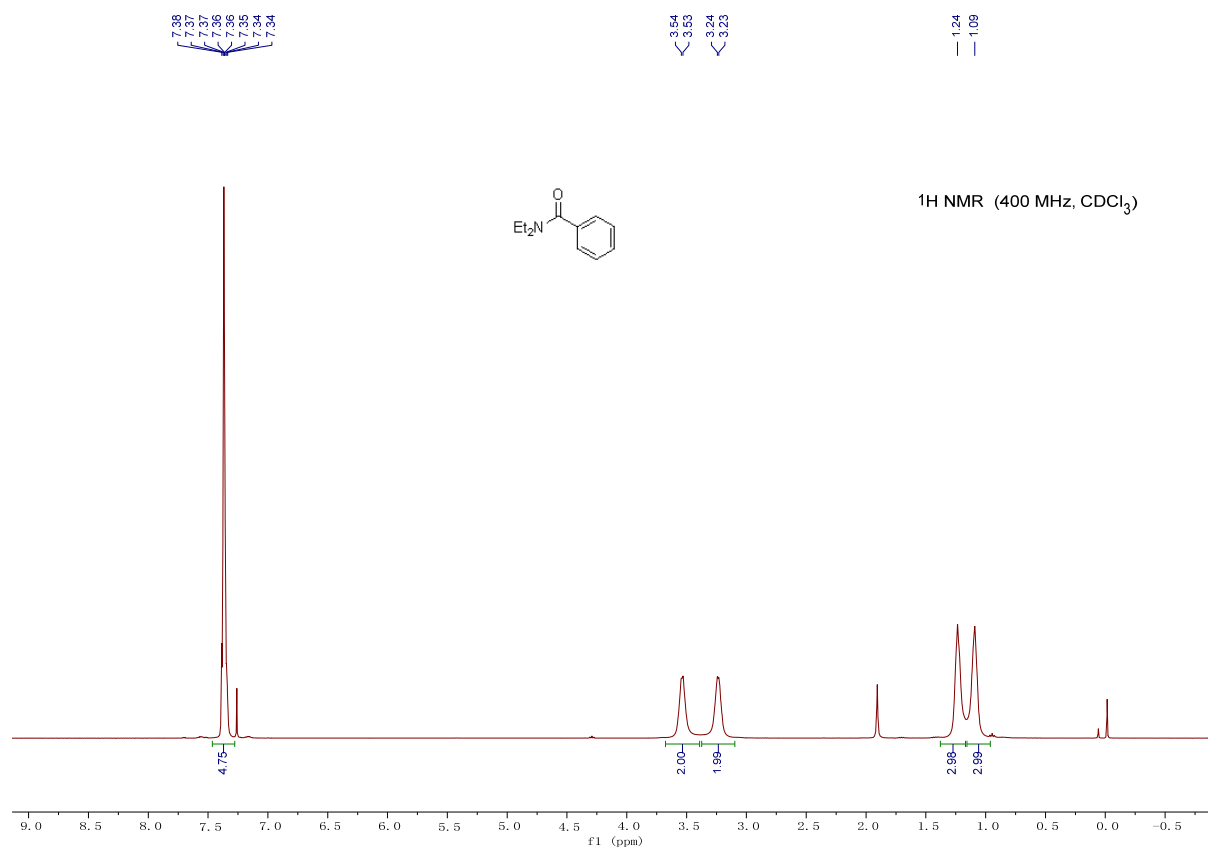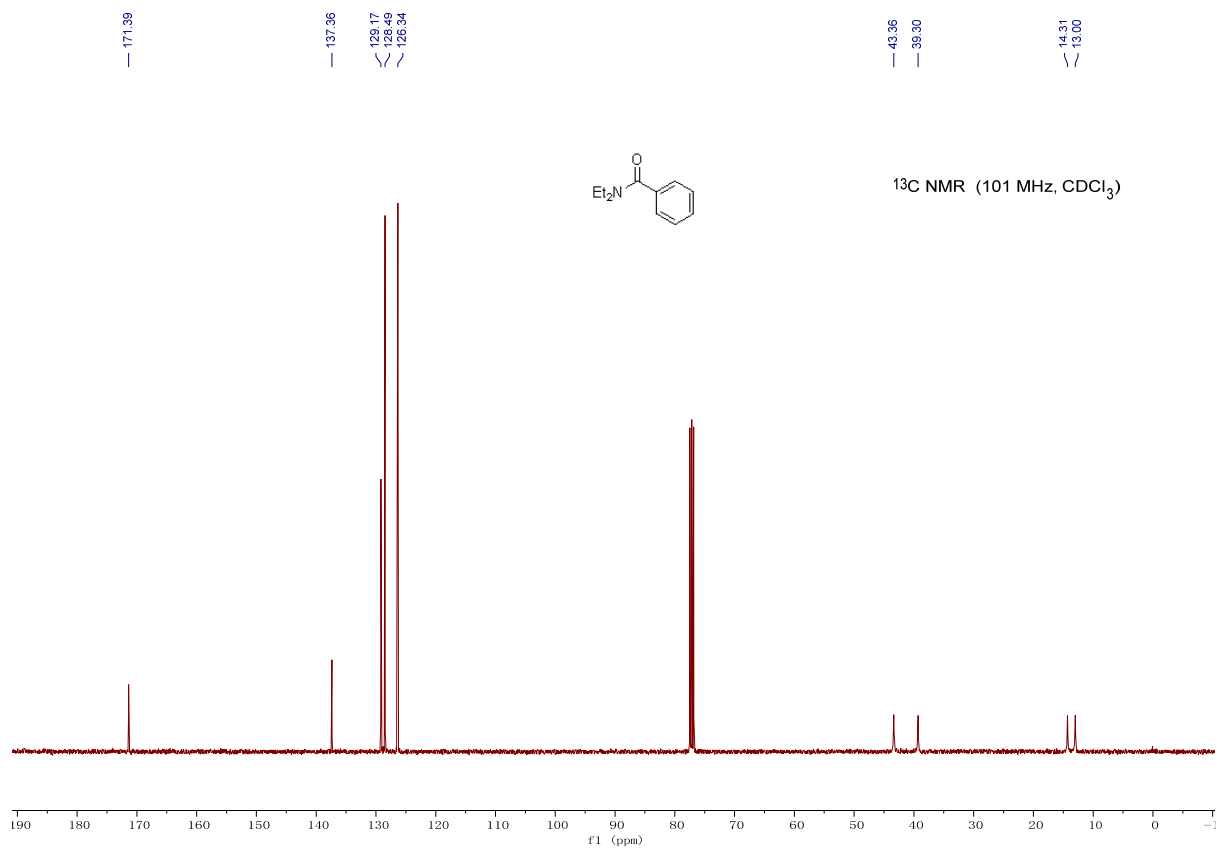

(10) 4-methyl-1,1'-biphenyl (**4a**)

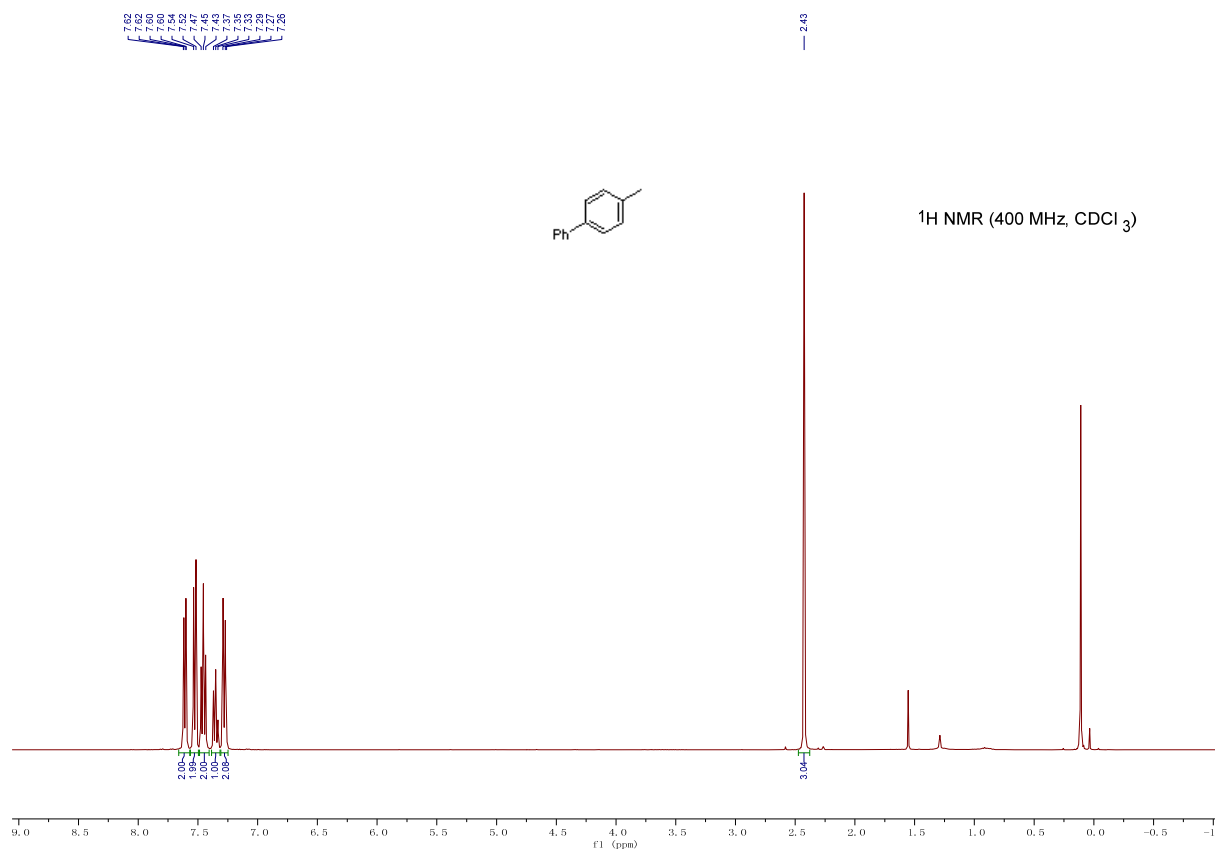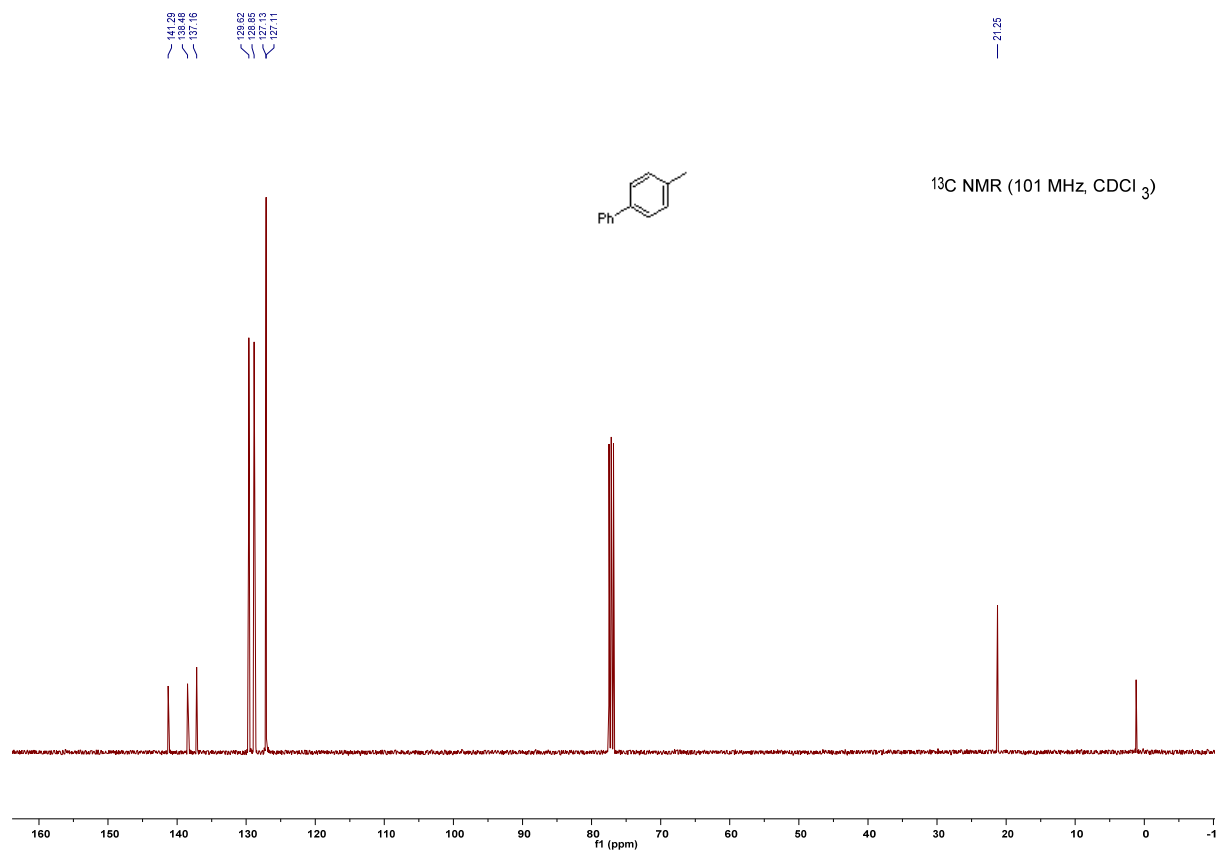

(11) 2-methylnaphthalene (**4d**)

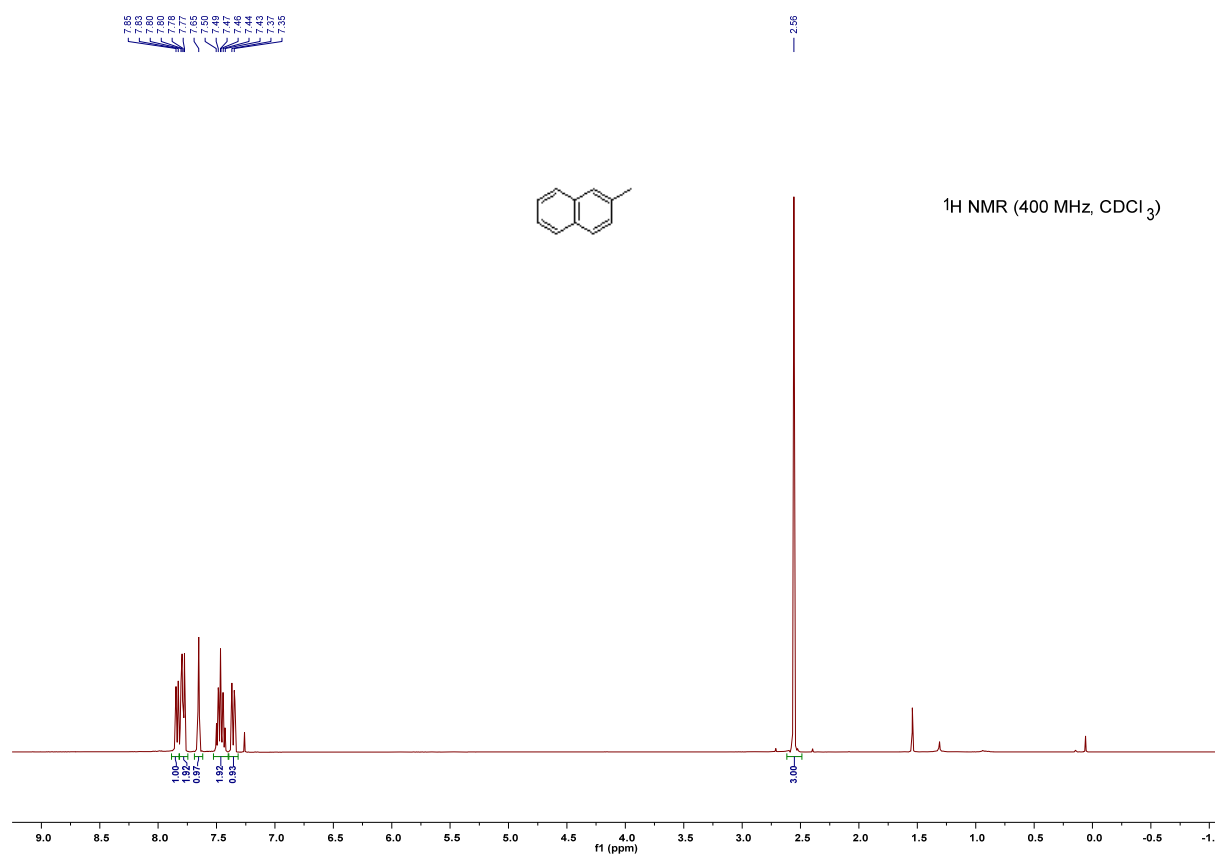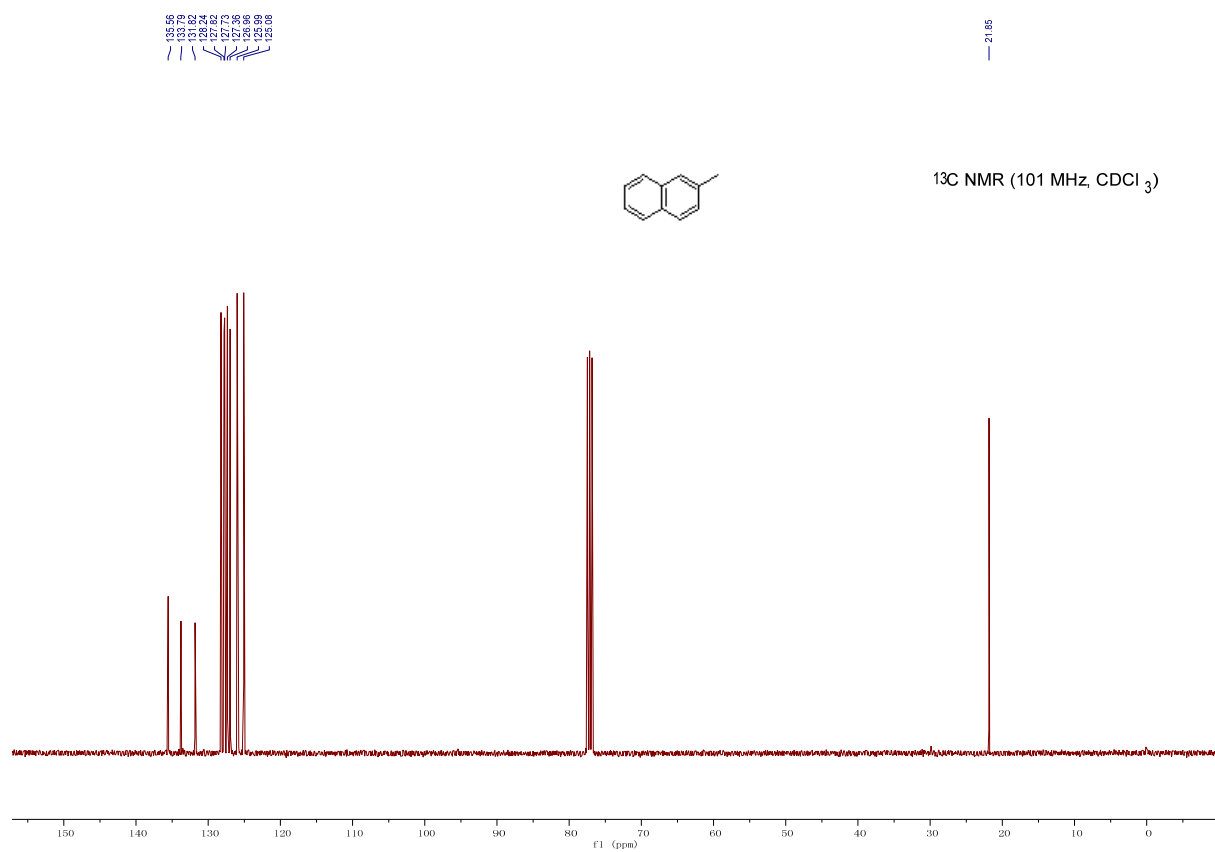

(12) 6-methylquinoline (**4e**)

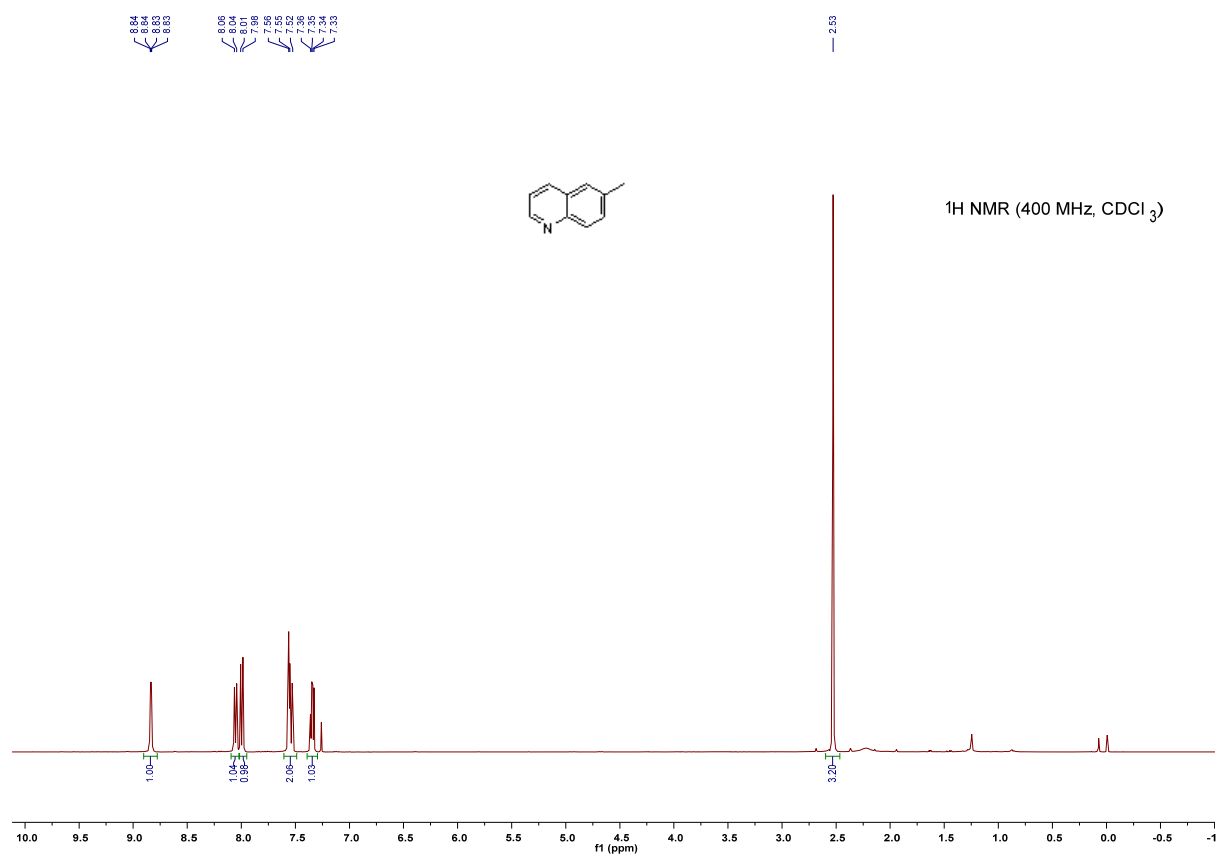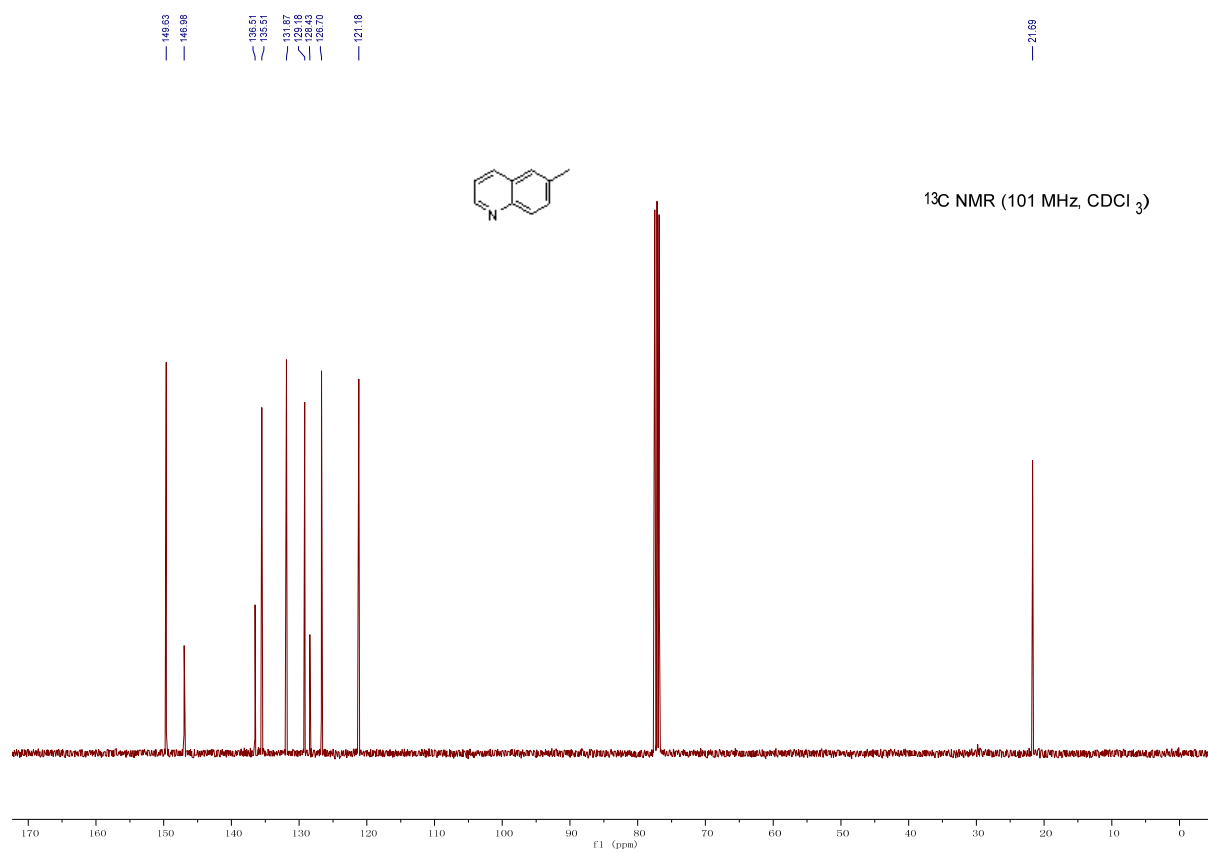

(13) diphenylmethane (**4f**)

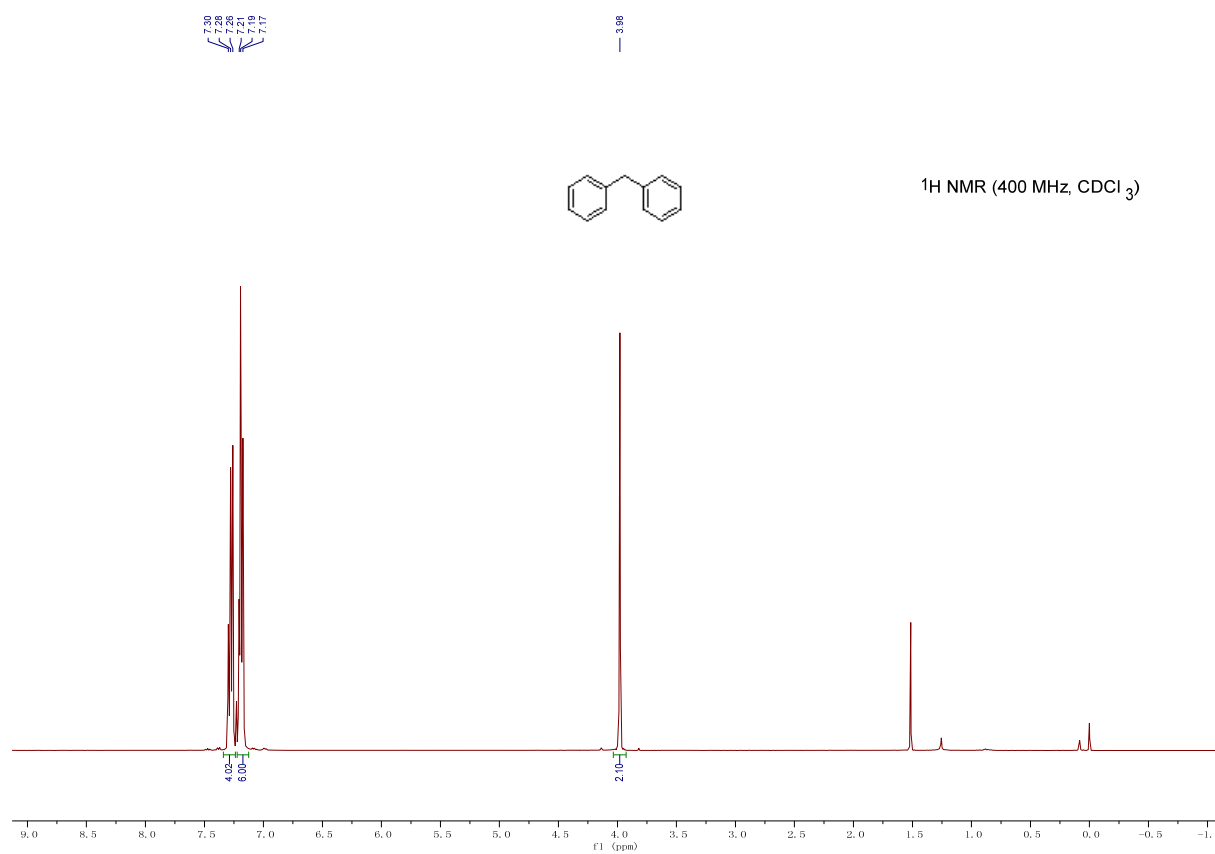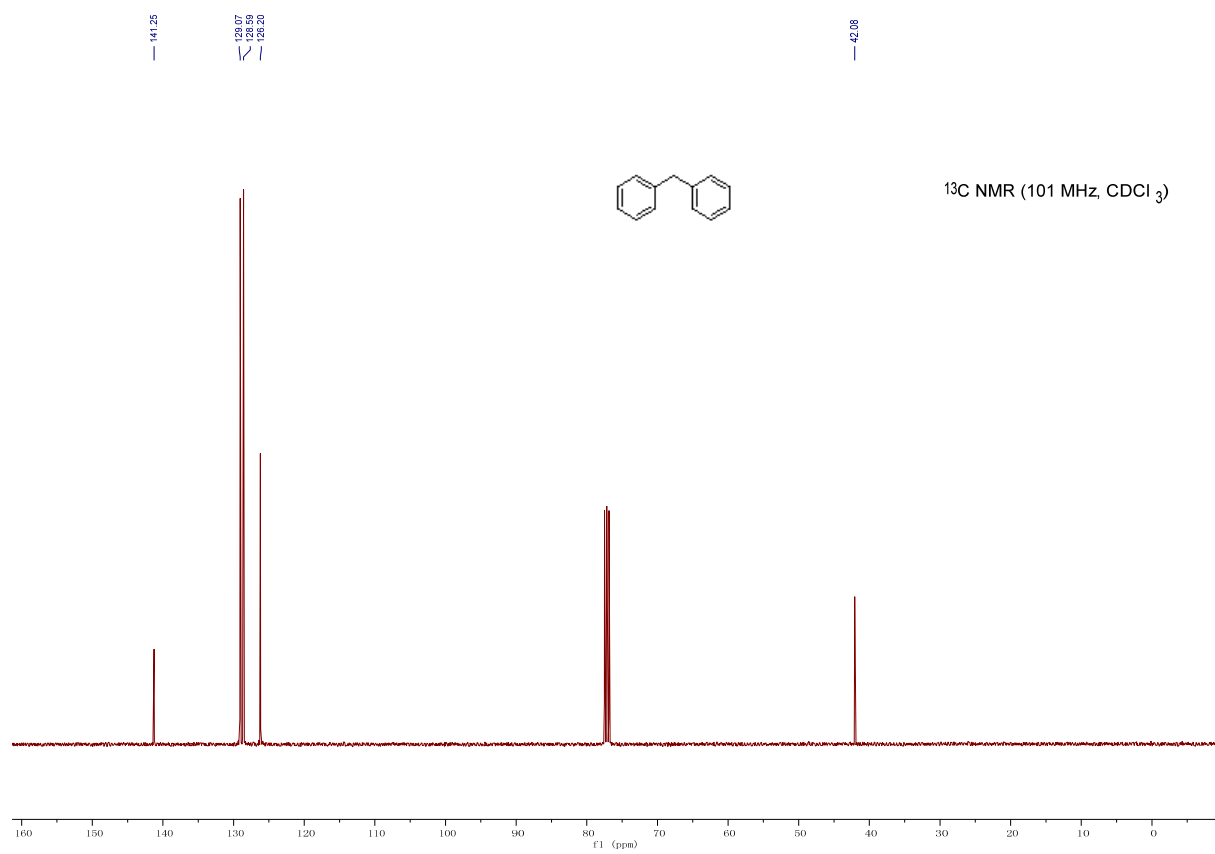

Supplement: c7cc09668b1.pdf [file c7cc09668b1.pdf]
